# Supplementary material for: Bi-ligand-fabricated CdS quantum dots to photo-induce aqueous-phase aldol condensation for biomass-derived carbonyl compounds
Source: Royal Society of Chemistry journal article supplement (doi:10.1039/d3cc05179j), 2023-12-20
Supplement: d3cc05179j1.pdf [file d3cc05179j1.pdf]

## *Supplementary Information*

# **Bi-Ligands Fabricated CdS Quantum Dots to Photo-induce Aqueous-Phase Aldol Condensation for Biomass-derived Carbonyl Compounds**

Dong-Dong Wei, Liu-Meng Mo, Jing-Yu Zhang, Yong-Shuai Zhang, Hui-Min Duan,  
Bin Zhang, Hong-Yan Wang\*

Key Laboratory for macromolecular Science of Shaanxi Province, School of  
Chemistry and Chemical Engineering, Shaanxi Normal University, Xi'an, 710119,  
China

\*Correspondence E-mail: hongyan-wang@snnu.edu.cn

## **Table of Contents**

|                                                            |           |
|------------------------------------------------------------|-----------|
| <b>1. Experimental Section.....</b>                        | <b>2</b>  |
| <b>1.1 Materials .....</b>                                 | <b>2</b>  |
| <b>1.2 Characterizations.....</b>                          | <b>2</b>  |
| <b>1.3 The preparation of photocatalysts.....</b>          | <b>3</b>  |
| <b>1.4 The preparation of photocatalytic systems .....</b> | <b>4</b>  |
| <b>2. Supporting Figures and Tables .....</b>              | <b>6</b>  |
| <b>3. Supporting Spectroscopic Data .....</b>              | <b>31</b> |
| <b>4. Supporting References.....</b>                       | <b>59</b> |

## **1. Experimental Section**

### **1.1 Materials**

All reactions were carried out under an atmosphere of nitrogen, unless otherwise specified. DMPO (dimethyl-1-pyrroline-N-oxide) used for EPR analysis was obtained from Dongren Chemical Technology Co., Ltd., while all other chemicals used in this work were purchased from Energy Chemical Co., Ltd. The purification of the crude reaction products was realized by using thin layer chromatography (TLC) with 300-400 mesh silica gels.

### **1.2 Characterizations**

High-resolution transmission electron microscopy (HR-TEM) images were obtained by using a Tecnai G2 F20 electron microscope operating at 200 kV. An X-ray powder diffractometer (XRD) was operated to characterize the structures of materials on Bruker D8 Advance. X-ray photoelectron spectroscopy (XPS) was performed using the KRATOS Axis ultra DLD X-ray photoelectron spectrometer. UV-vis diffuse reflectance spectrum (UV-vis DRS) was obtained by using a UV-vis-NIR spectrometer (Perkin-Elmer, USA) at room temperature from 200 to 800 nm with BaSO<sub>4</sub> pellets as a background. UV-vis absorption spectrum was recorded on U-3900 UV-vis spectrophotometer (Hitachi). Photoluminescent (PL) spectrum was recorded using a fluorescence spectrometer (F-7000, Hitachi). Fourier transform infrared (FT-IR) spectrum was collected on a FT-IR spectrometer (Spectrum One, Perkin Elmer). Electron paramagnetic resonance (EPR) analysis was made by using German Bruker EMX-10/12 electronic paramagnetic spectrometer. Liquid product was

detected on GC MS-QP2010 Ultra gas chromatograph with the extracted sample vaporized on the instrument. Pure organic complexes were used as standards to obtain the retention time and to quantify the yields of the reaction products. NMR data ( $^1\text{H}$  NMR and  $^{13}\text{C}$  NMR) were recorded with a 400 MHz Bruker spectrometer, in which chemical shift was expressed in parts per million (ppm) unit with tetramethylsilane as the standard.  $\text{H}_2$  detection and quantification were carried out using a TCD detection port on TIAN MEI 7900 GC gas chromatograph.

### **1.3 Synthesis of photocatalysts**

#### **1.3.1 The synthesis of CdS-MUA&P**

The synthesis of **CdS-MUA&P** was based on a modified procedure recently reported by us.<sup>1</sup> Under a  $\text{N}_2$  atmosphere,  $\text{CdCl}_2 \cdot \text{H}_2\text{O}$  (114.8 mg, 0.57 mmol) was dissolved in 100 mL of  $\text{H}_2\text{O}$ . To this solution, proline (345.39 mg, 3 mmol) was added, and followed by the addition of 11-mercaptoundecanoic acid (MUA, 109.18 mg, 0.5 mmol). The pH of resulted solution was then adjusted to pH 7 with 1 M NaOH. Upon the reaction, the solution changed from colorless to turbid white, which eventually afforded a colorless transparent solution under successive stirring. After adding 5 mL of 0.1 M  $\text{Na}_2\text{S}$  solution and refluxing the mixture for 4 h, a clear bright orange solution was obtained, which was then evaporated under vacuum to remove the solvent, yielding a yellow viscous liquid. The resulted residue was treated with isopropanol and centrifuged to isolate the unreacted reagents. Repeated the above purification twice, which afforded 163 mg **CdS-MUA&P** as light-orange powders after drying under room conditions. Noted that the ratio of MUA and proline can

affect the transparency of reaction system for the synthesis of **CdS-MUA&P** and even the efficiency for photocatalytic aldol condensation. Therefore, the ratio was regulated, which indicated 1: 6 was the best, which not only guaranteed the reaction system transparency for **CdS-MUA&P** synthesis, but also enabled to obtain the highest efficiency for aldol condensation by **CdS-MUA&P**.

### **1.3.2 The synthesis of CdS-P**

The synthesis of **CdS-P** followed the similar method applied for **CdS-MUA&P**, excepted that only proline was added. In typical procedures, 101 mg **CdS-P** was obtained as yellow powders.

### **1.3.3 The synthesis of CdS-MUA&P'**

The similar procedure with the synthesis of **CdS-MUA&P** was also operated for **CdS-MUA&P'** with N-methyl-proline used instead. In typical procedures, 152 mg **CdS-MUA&P'** was obtained as orange powders.

## **1.4 The preparation of photocatalytic systems**

The photocatalytic aldol condensation was carried out in a quartz test tube under successive stirring at room temperature. In a typical experiment, 5 mg photocatalyst was dispersed in 0.5 mL H<sub>2</sub>O. TEA (4 mmol) was then added. The reagent FF or HMF (0.5 mmol) was injected in above reaction system, and then mixed with 1.5 mL biomass-derived ketones, which acted as both substrate and solvent. The total reaction system was 2.5 mL. After purged with N<sub>2</sub> for 30 min, the system was sealed and irradiated with a LED ( $\lambda = 420 \text{ nm}$ , the input optical power is  $8.37 \text{ mW cm}^{-2}$ ) for 1.5 h. After the photocatalytic reaction, the photocatalytic system was extracted by

CH<sub>2</sub>Cl<sub>2</sub> for three times. The organic phase was dried by anhydrous Na<sub>2</sub>SO<sub>4</sub> and was evaporated under vacuum. The crude products were further purified using TLC with 300-400 mesh silica gels by the proper elutes. The conversion and yield for the generation of target products were defined as follows:<sup>2</sup>

$$\text{Conversion (\%)} = [(C_0 - C_r) / C_0] \times 100$$

$$\text{Yield (\%)} = C_p / C_0 \times 100$$

in which  $C_0$  is the initial concentration of reactant,  $C_r$  and  $C_p$  are the concentrations of reactant and target products at a certain reaction time, respectively.

## 2. Supporting Figures and Tables

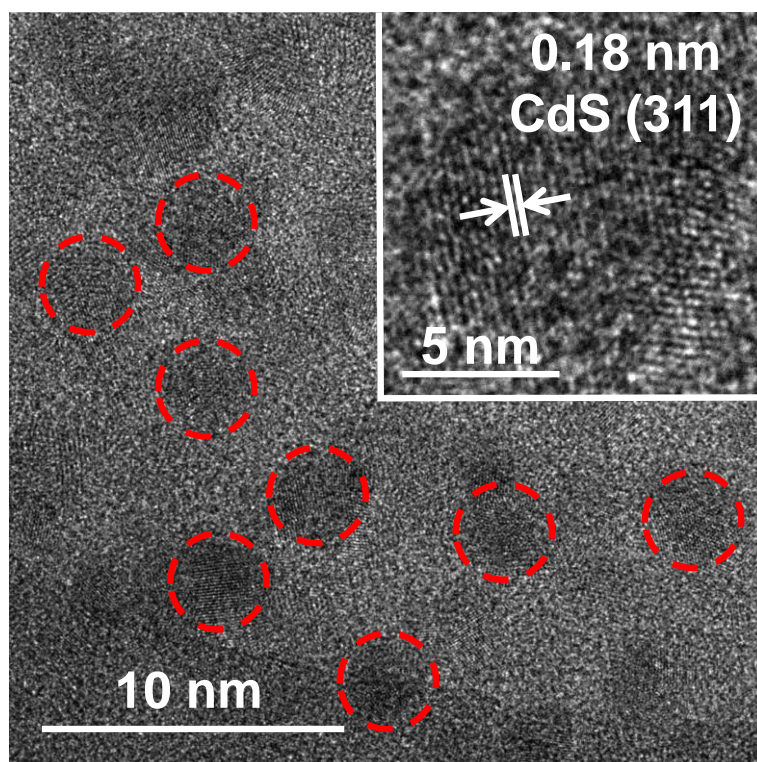

**Fig. S1** The HR-TEM image of CdS-MUA&P.

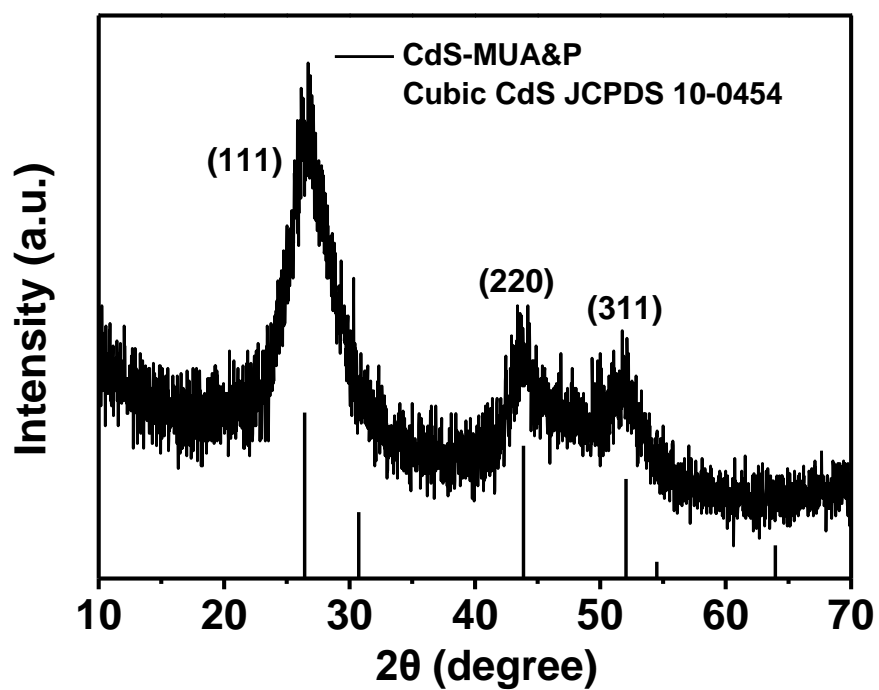

**Fig. S2** The XRD spectrum of **CdS-MUA&P**, showing characteristic CdS peaks (JCPDS 10-0454): the  $2\theta$  at  $26.69^\circ$ ,  $43.88^\circ$  and  $51.91^\circ$  corresponded to the (111), (220) and (311) planes of a cubic structure, respectively.<sup>3</sup>

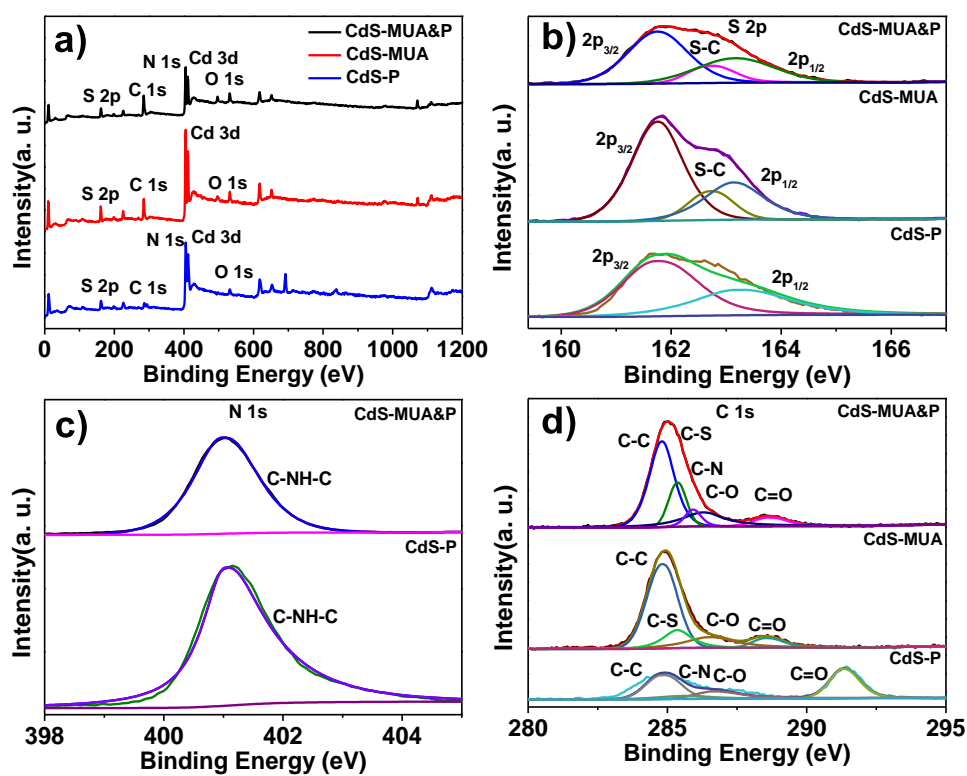

**Fig. S3** The XPS spectra of (a) full spectrum, (b) S 2p, (c) N 1s, (d) C 1s for CdS-MUA&P, CdS-MUA and CdS-P respectively.



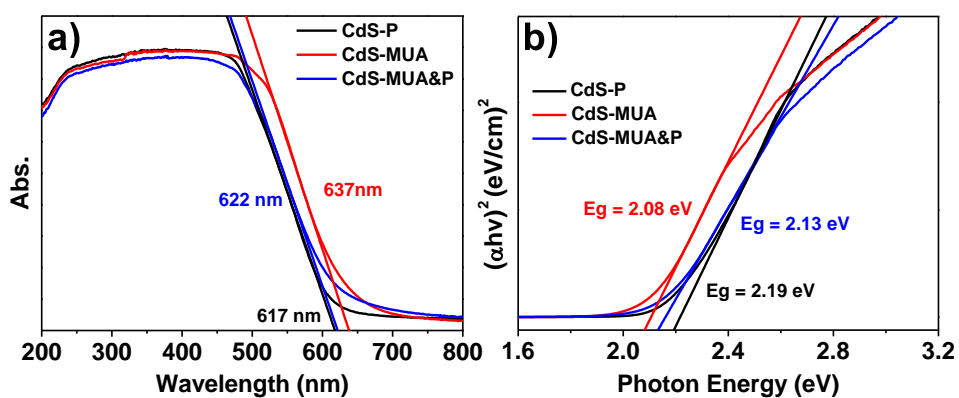

**Fig. S4** a) The UV-vis DRS spectra of **CdS-P**, **CdS-MUA**, **CdS-MUA&P** respectively; b) the corresponding Tauc plots  $(\alpha h\nu)^2$  plots versus  $h\nu$  for each material.

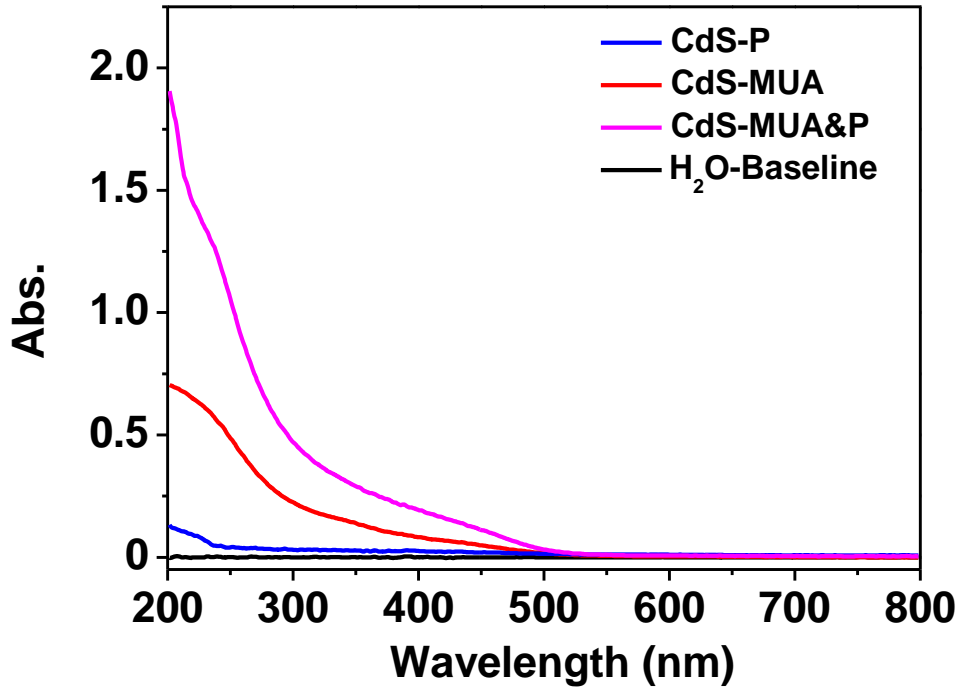

**Fig. S5** UV-vis spectrum of CdS-MUA&P, CdS-MUA and CdS-P.

Based on the equations suggested by Peng and coworkers, the diameter ( $D$ ), extinction coefficient ( $\varepsilon$ ) and concentration ( $c$ ) of QDs can be determined as follows:<sup>4</sup>

$$D = (-6.6521 \times 10^{-8})\lambda^3 + (1.9557 \times 10^{-4})\lambda^2 - (9.2352 \times 10^{-2})\lambda + (13.29) \quad (1)$$

$$\varepsilon = 21536(D)^{2.3} \quad (2)$$

$$Abs = \varepsilon c L \quad (3)$$

in which  $D$  (nm) is the size or diameter of nanocrystal sample, and  $\lambda$  (nm) is the wavelength of its first excitonic absorption peak,  $\varepsilon$  represents the extinction coefficient of nanocrystal ( $\text{mol L}^{-1} \text{cm}^{-1}$ ),  $L$  (cm) is cuvette length in the direction of irradiation,  $Abs$  is the absorbance of sample and  $c$  represents its concentration ( $\text{mol L}^{-1}$ ).

Accordingly, the concentration of CdS-MUA&P, CdS-MUA and CdS-P was evaluated as  $2.79 \times 10^{-5}$ ,  $1.05 \times 10^{-5}$  and  $1.21 \times 10^{-6} \text{ mol L}^{-1}$  respectively. Here, we described the concentration

determination process for QDs in water, which facilitated to compare PL under the similar concentration and conditions.

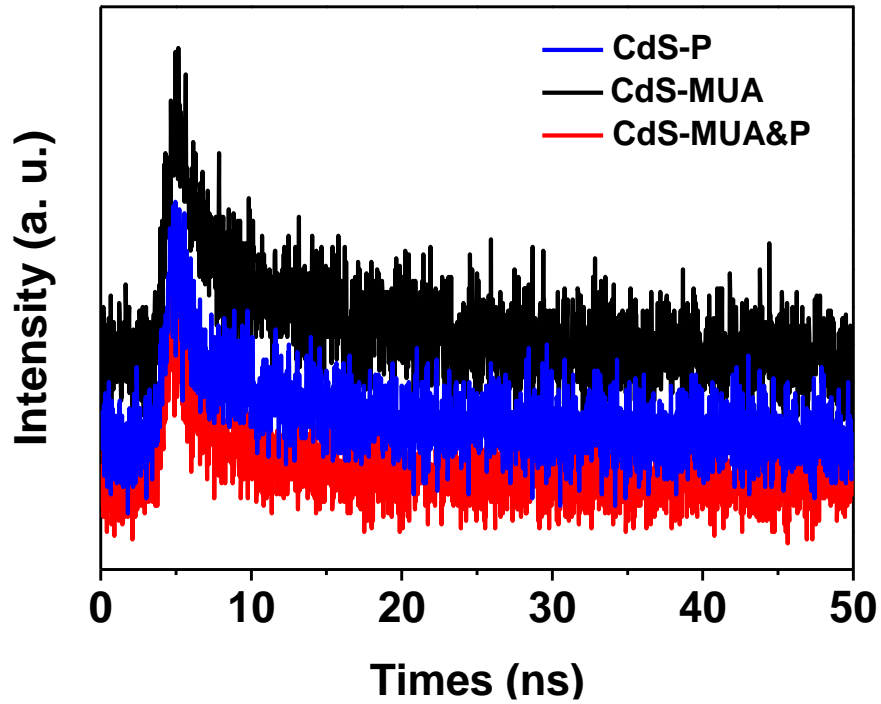

**Fig. S6** The time-resolved photoluminescence decay of **CdS-MUA&P**, **CdS-MUA**, **CdS-P** respectively.

The time-resolved photoluminescence curves were fitted by a biexponential function based on the equation (4):<sup>5</sup>

$$I(t) = A_1 \exp(-t/\tau_1) + A_2 \exp(-t/\tau_2) \quad (4)$$

in which  $\tau_1$  and  $\tau_2$  represent for the short and long lifetime of decay respectively, and  $A_1$  and  $A_2$  are the amplitudes of photoluminescence. The average lifetime  $\tau$  was calculated as the equation (5):<sup>5</sup>

$$\tau = \frac{\sum A_i \tau_i^2}{\sum A_i \tau_i} \quad (5)$$

The  $\tau_1$ ,  $\tau_2$  and  $\tau$  for **CdS-MUA&P**, **CdS-MUA** and **CdS-P** were listed in Table S3 respectively.

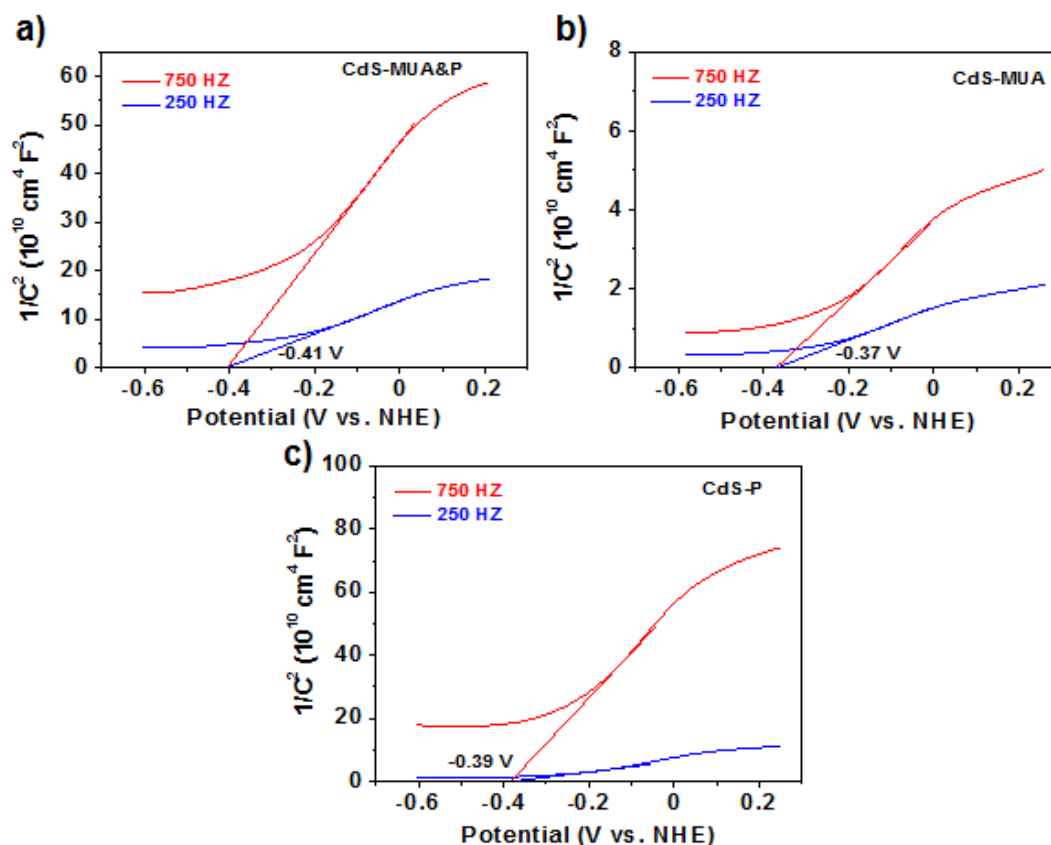

**Fig. S7.** The Mott-Schottky (MS) curves for determining the band location of each sample.

As a typical n-type semiconductor, CdS OQs have the negligible gap between flat band potential ( $V_{fb}$ ) and bottom edge of CB.<sup>6</sup> As shown in Fig. S7, **CdS-MUA&P**, **CdS-MUA** and **CdS-P** displayed the position of CB at -0.41 eV, -0.37 eV and -0.39 eV respectively. Based on the  $E_g$  estimated from UV-vis DRS spectra in Fig. S4, the VB were located at 1.72 eV, 1.71 eV and 1.80 eV respectively.

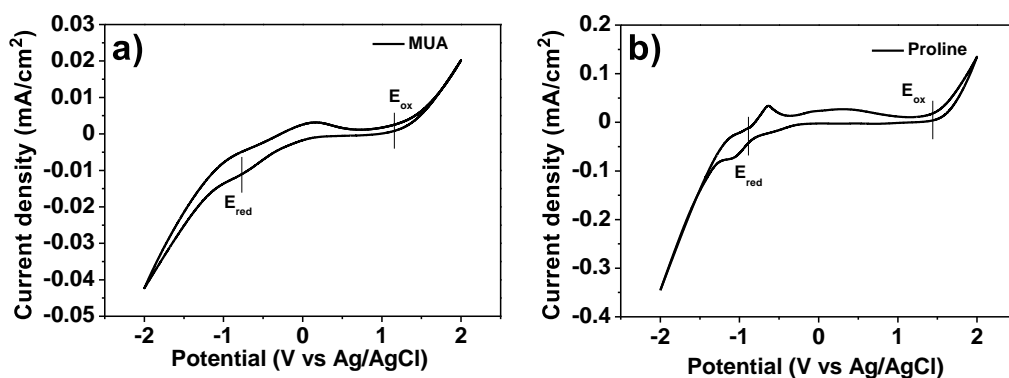

**Fig. S8** CV spectra of (a) MUA and (b) proline in  $\text{CH}_3\text{CN}$  respectively, which was carried out with bare FTO electrode as working electrode, Ag/AgCl electrode as reference and graphite rod as a counter electrode with  $\text{Bu}_4\text{NPF}_6$  as supporting electrolyte.

The determination for the HOMO band level of CDs was based on CV measurement, which was according to the following equation:<sup>7</sup>

$$E_{\text{HOMO}} = -(E_{\text{ox}} + E_{\text{ref}}) \quad (6)$$

Here,  $E_{\text{ox}}$  represents the first oxidation potential, and  $E_{\text{ref}}$  is the potential of the reference electrode, in which the potentials were reference to the Ag/AgCl electrode. The values of  $E_{\text{HOMO}}$  were evaluated versus vacuum level.

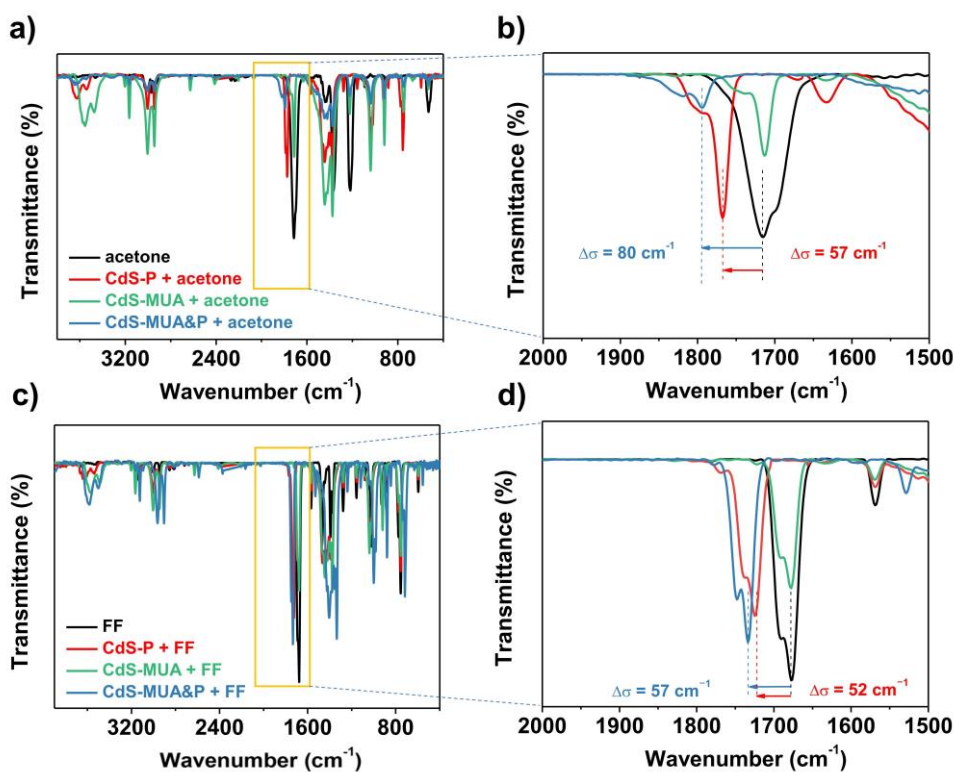

**Fig. S9** FT-IR spectra of (a) acetone and (c) FF with different photocatalytic samples or without photocatalytic samples in  $\text{CH}_3\text{CN}$ ; (b) and (d) the enlarged spectra in the C=O signal range.

Fig. S9 exhibited the IR spectra of acetone, the mixture of acetone and **CdS-P**, the mixture of acetone and **CdS-MUA**, and the mixture of acetone and **CdS-MUA&P** respectively. Since C=O groups displayed the signal around  $1700\text{ cm}^{-1}$ , Fig. S9 (b) showed the enlarged picture in such the signal ranges. It is distinct acetone displayed stretching vibrations of C=O  $1715\text{ cm}^{-1}$ , which moved to  $1794\text{ cm}^{-1}$  in the mixture of acetone and **CdS-MUA&P**. Such the shift ( $\Delta\sigma$ ) was also observed when **CdS-MUA&P** was switched into **CdS-P** with the shift of  $57\text{ cm}^{-1}$ , but absent with **CdS-MUA** applied instead. Similarly, the shift of C=O group on FF was also detected in the mixture of FF and **CdS-MUA&P** or the mixture of FF and **CdS-P**. However, switching into

**CdS-MUA**, the shift was not observed. These results confirmed that H-bonds were formed between NH moiety on proline of QDs and carbonyl groups on FF and acetone.



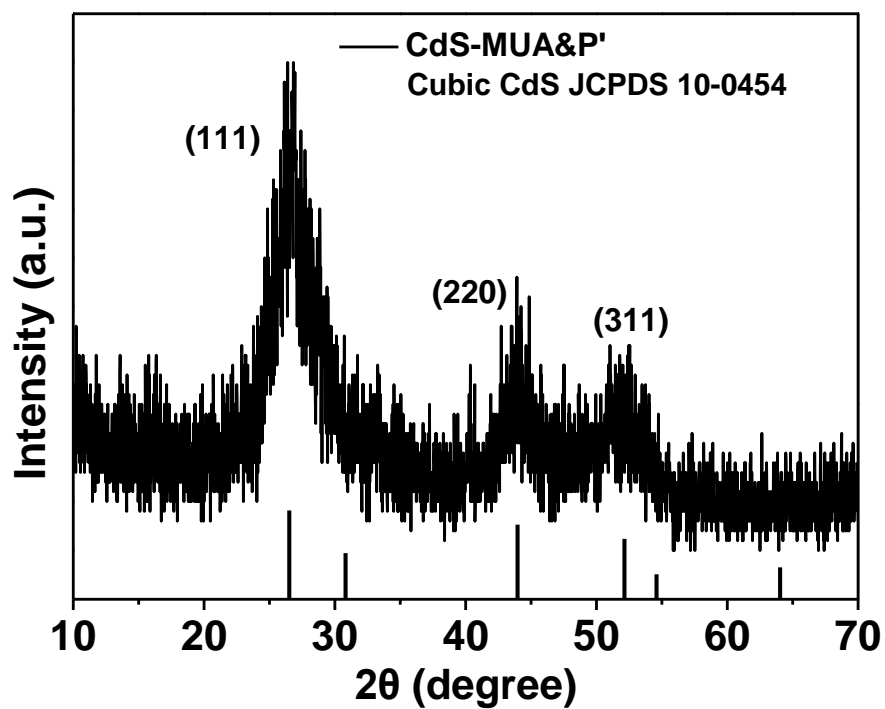

**Fig. S10** The XRD spectrum of CdS-MUA&P', showing characteristic CdS peaks (JCPDS 10-0454): the  $2\theta$  values of  $26.58^\circ$ ,  $43.86^\circ$  and  $51.96^\circ$  corresponded to the (111), (220) and (311) planes of a cubic structure, respectively.<sup>3</sup>

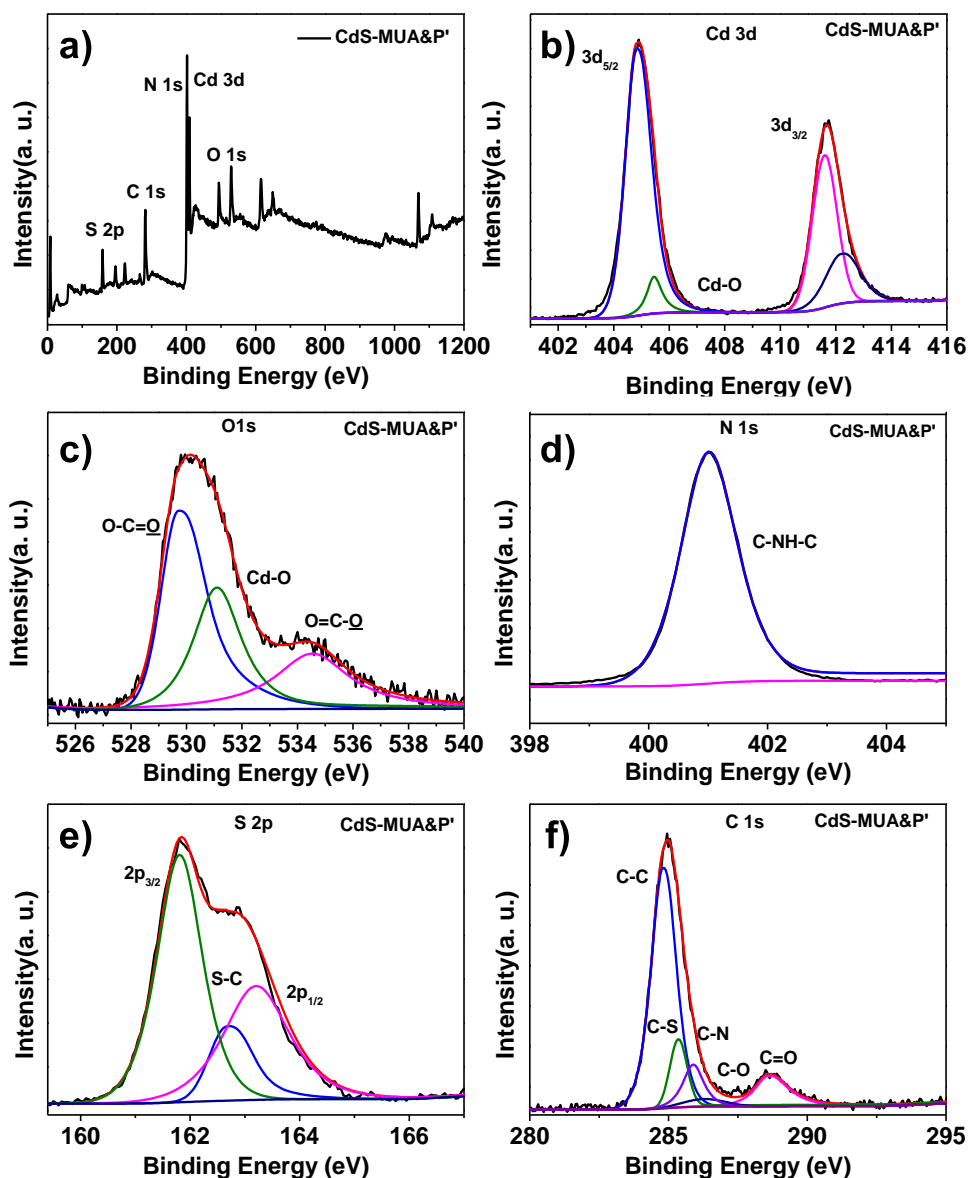

**Fig. S11** The XPS spectra of (a) full spectrum, (b) Cd 3d, (c) O 1s, (d) N 1s (e) S 2p and (f) C 1s respectively for **CdS-MUA&P'**.

Fig. S9a showed the full scan of XPS spectra for **CdS-MUA&P'**. The Cd 3d spectrum displayed two peaks at 411.6 and 404.8 eV, which were in line with the binding energy for Cd 3d<sub>3/2</sub> and Cd 3d<sub>5/2</sub> respectively (Fig. S9b).<sup>8</sup> It indicated 6.8 eV binding energy difference, which identified Cd<sup>2+</sup> was involved in **CdS-MUA&P'**. Further deconvolution led to respective signals at 412.2 and 405.5 eV were assigned to Cd-O bond, which was correlated with the peak at 531.1 eV in O 1s

spectrum (Fig. S9c), implying N-methyl-proline was anchored on QDs surface by Cd-O bond. This was consistent with that for the formation of **CdS-MUA&P** and **CdS-P**. Moreover, the peaks at 529.7 and 534.5 eV in O 1s spectrum can be ascribed to the binding energy of O-C=O, O=C-O. The N 1s spectrum displayed peak at 401.0 eV (Fig. S9d). The S 2p spectrum exhibited peaks at 163.2 and 161.8 eV (Fig. S9e), which were the typical signals belonged to metallic sulfides, accompanied by a peak at 162.7 eV ascribed to S-C bond on MUA chain.<sup>8</sup> The C 1s spectrum displayed five peaks at 284.8, 285.4, 285.9, 286.3 and 288.6 eV (Fig. S9f), which corresponded to C-C, C-S, C-N, C-O and C=O respectively. Therefore, **CdS-MUA&P'** exhibited the analogous bond connection to **CdS-MUA&P** based on XPS.

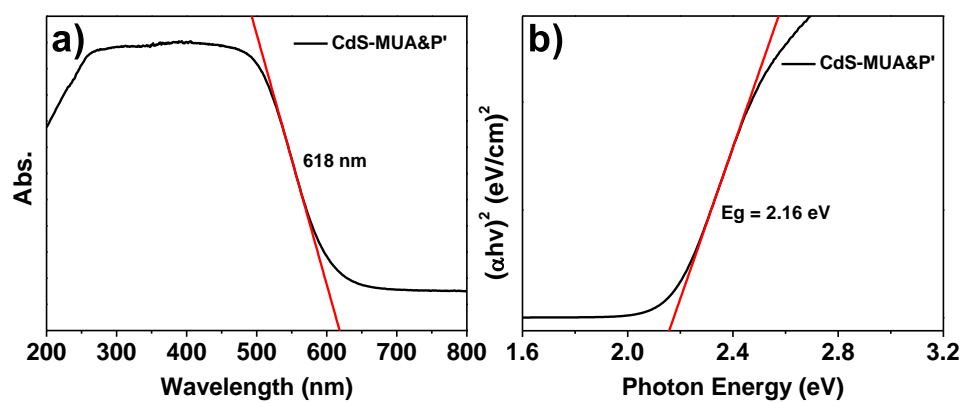

**Fig. S12** a) The UV-vis DRS spectra of **CdS-MUA&P'**; b) the corresponding Tauc plots  $(\alpha h\nu)^2$  plots versus  $h\nu$ .

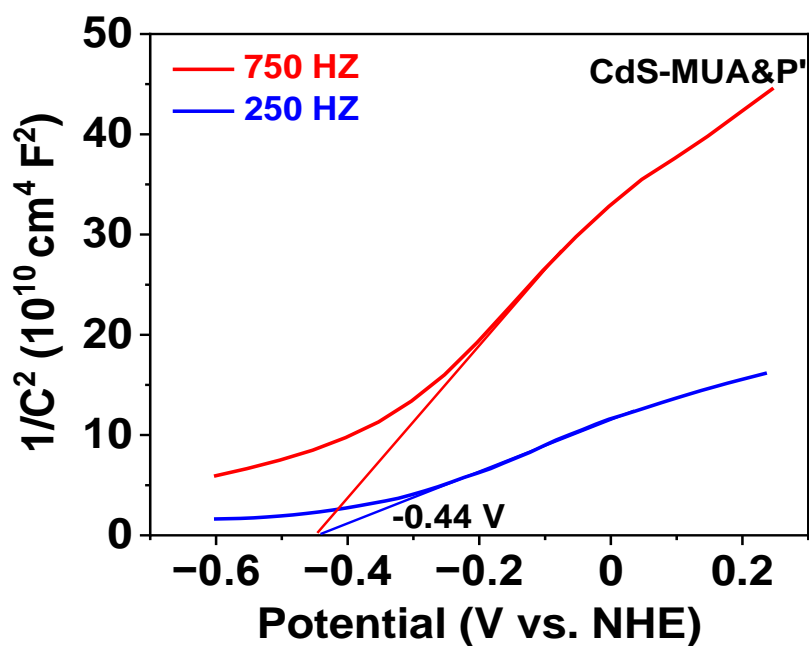

**Fig. S13.** The Mott-Schottky (MS) curves for determining the band location of CdS-MUA&P'.

As shown in Fig. S13, CdS-MUA&P' displayed the position of CB at -0.44 eV. Based on the  $E_g$  estimated from UV-vis DRS spectra in Fig. S12, the VB were located at 1.72 eV.

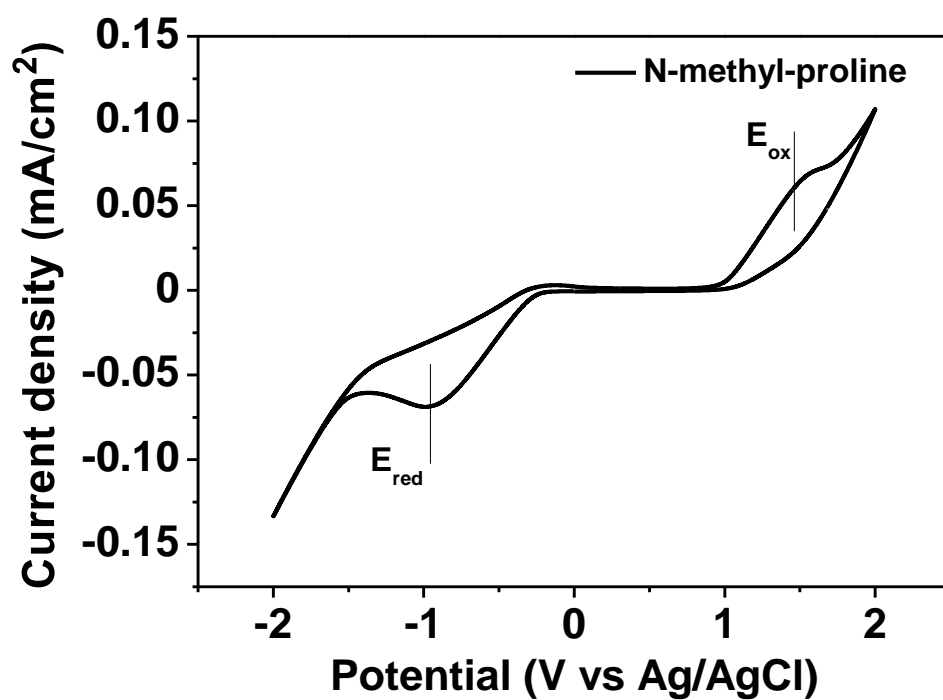

**Fig. S14** CV spectrum of N-methyl-proline, which was carried out with bare FTO electrode as working electrode, Ag/AgCl electrode as reference and graphite rod as a counter electrode.<sup>7</sup>

Based on equation (6), the HOMO level of N-methyl-proline was calculated at 1.67 V.

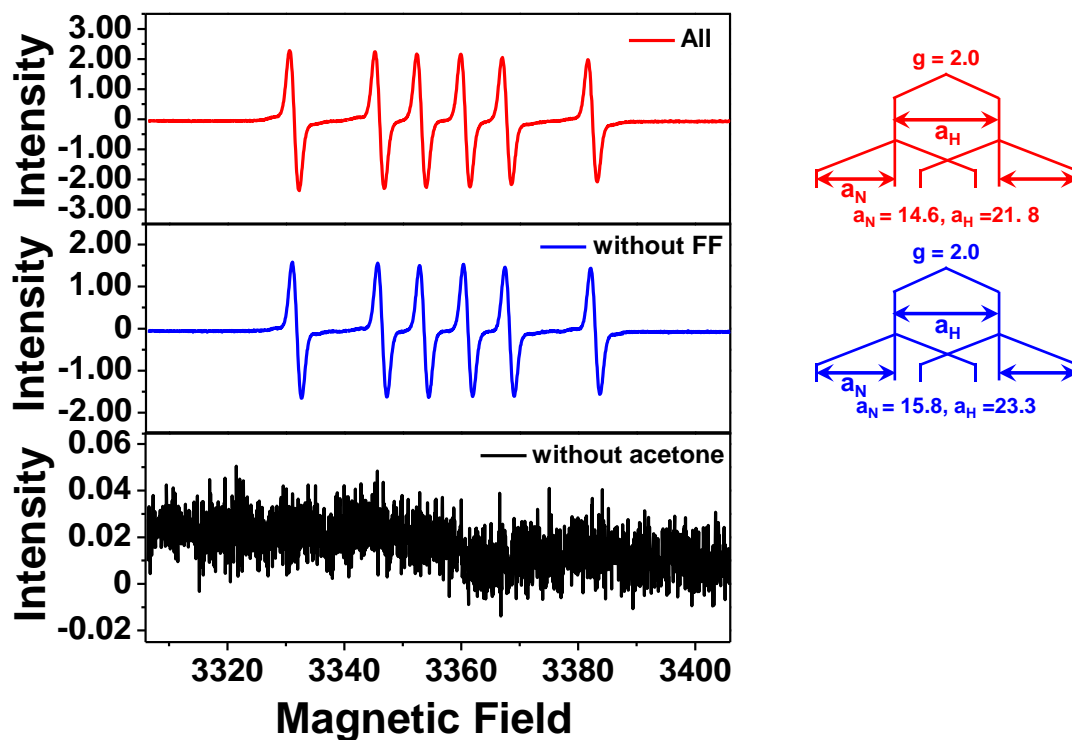

**Fig. S15** Experimental EPR spectra of the reaction mixture under irradiation. Condition: 2 mL acetone/H<sub>2</sub>O mixture, **CdS-MUA&P** (2 mg mL<sup>-1</sup>), TEA (1.6 M), DMPO (0.12 M) with or without FF (0.2 M) under LED irradiation ( $\lambda = 420$  nm) for 10 min under N<sub>2</sub> at room temperature. In the system without acetone, H<sub>2</sub>O was added to guarantee each component under the same concentration.

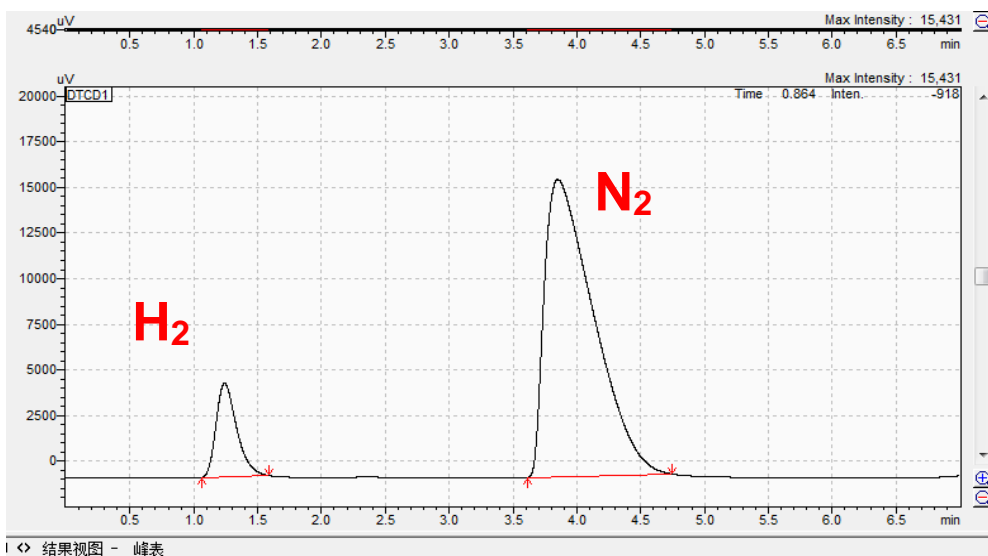

**Fig. S16** The GC spectrum of gas composition measured by photocatalytic system using **CdS-MUA&P** as catalyst, in which Ar was applied as carrier gas, and the hydrogen production was calculated as  $124 \mu\text{mol g}_{\text{cat}}^{-1} \text{h}^{-1}$  through external standard method.



**Table S1** The effect of acetone and water ratio for aldol condensation of FF with acetone by **CdS-MUA&P**.

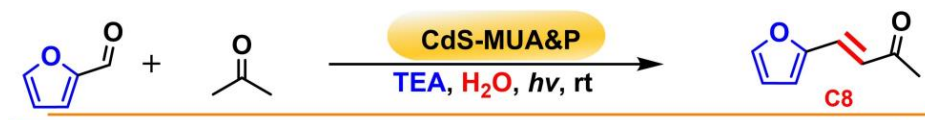

| Entry | Acetone : H <sub>2</sub> O | Yield (%) | Conversion (%) |
|-------|----------------------------|-----------|----------------|
| 1     | 1 : 1                      | 60.9      | 81.4           |
| 2     | 1.5 : 0.5                  | 98.9      | 100            |
| 3     | 0.5 : 1.5                  | 47.8      | 54.2           |

**Table S2.** The control for the reaction of FF and acetone under the standard conditions.



| Entry | photocatalyst | TEA | light | Yield (%) | Conversion (%) |
|-------|---------------|-----|-------|-----------|----------------|
| 1     | CdS-MUA&P     | √   | ×     | 27.2%     | 29.6%          |
| 2     | CdS-MUA&P     | ×   | √     | 0         | 0              |
| 3     | ×             | √   | √     | 23.1%     | 25.8%          |

**Table S3.** Recycling experiments for aldol condensation of FF and acetone with **CdS-MUA&P** as the photocatalyst under the standard condition.

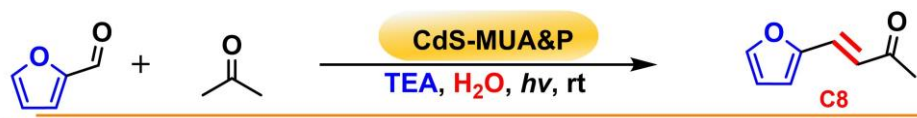

| Entry | Recycle Times | Yield (%) | Conversion (%) |
|-------|---------------|-----------|----------------|
| 1     | 0             | 98.9      | 100            |
| 2     | 1             | 80.7      | 94.3           |
| 3     | 2             | 62.2      | 87.1           |
| 4     | 3             | 51.1      | 72.8           |

**Table S4.** The time-resolved photoluminescence lifetime of **CdS-MUA&P**, **CdS-MUA** and **CdS-P** respectively.

| Entry | Photocatalyst        | Short lifetime ( $\tau_1$ ) | Long lifetime ( $\tau_2$ ) | Average lifetime ( $\tau$ ) |
|-------|----------------------|-----------------------------|----------------------------|-----------------------------|
| 1     | <b>CdS-MUA&amp;P</b> | 1.1 ns                      | 9.1 ns                     | 7.6 ns                      |
| 2     | <b>CdS-MUA</b>       | 1.5 ns                      | 14.8 ns                    | 12.9 ns                     |
| 3     | <b>CdS-P</b>         | 1.2 ns                      | 13.5 ns                    | 11.8 ns                     |

**Table S5.** The conduction band and valence band of **CdS-MUA&P**, **CdS-MUA&P'**, **CdS-MUA** and **CdS-P** respectively.

| Entry | Photocatalyst         | Band Gap (eV) | Conduction Band (V) | Valence Band (V) |
|-------|-----------------------|---------------|---------------------|------------------|
| 1     | <b>CdS-MUA&amp;P</b>  | 2.13          | -0.39               | 1.74             |
| 2     | <b>CdS-MUA&amp;P'</b> | 2.16          | -0.40               | 1.76             |
| 3     | <b>CdS-MUA</b>        | 2.08          | -0.36               | 1.72             |
| 4     | <b>CdS-P</b>          | 2.19          | -0.42               | 1.77             |

The determination for the CB and VB of CDs were based on the band gap of catalysts, which were according to the following equations:<sup>9</sup>

$$E_{CB} = \chi - E^\circ - 1/2E_g \quad (7)$$

$$E_{VB} = E_g + E_{CB} \quad (8)$$

Here,  $E_{CB}$  is the CB edge potential,  $E_{VB}$  is the VB edge potential,  $E_g$  is the band gap of CDs, which determined from UV-vis DRS (Fig. S4 and Fig. S10).  $\chi$  represents the electronegativity of the semiconductor, expressed as the geometric mean of the absolute electronegativity of the constituent atoms, which is defined as the arithmetic mean of the atomic electron affinity and the first ionization energy.<sup>9</sup>  $E^\circ$  is the energy of free electrons on the hydrogen scale  $\approx 4.5$  eV.

Visibly, the evaluation of energy-band position based on calculation is very close to those determined from M-S curves in Fig. S7 and Fig. S13. Therefore, the two methods can be mutually authenticated.

**Table S6.** Radical mechanism tests for aldol condensation of FF and acetone with **CdS-MUA&P** as the photocatalyst in the presence of TBC under the standard conditions.

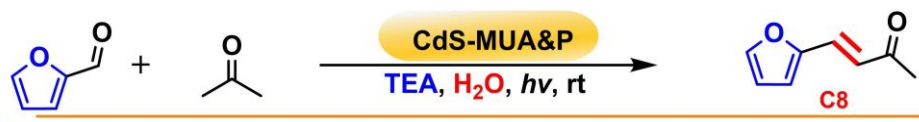

| Entry | TBC addition (mmol) | Yield (%) | Conversion (%) |
|-------|---------------------|-----------|----------------|
| 1     | 0                   | 98.9      | 100            |
| 2     | 0.25                | 41.7      | 53.1           |
| 3     | 0.50                | 29.3      | 41.9           |
| 4     | 1.00                | 2.8       | 9.1            |

### 3. Supporting Spectroscopic Data

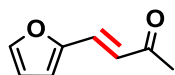

**4-(furan-2-yl)but-3-en-2-one (C8):** The crude product was purified by TLC isolation with eluent (petroleum ether: acetone= 15: 1) to afford **C8** in 98.9% yield (134 mg);  $^1\text{H}$  NMR (600 MHz, Chloroform-*d*):  $\delta$  = 7.50 (d,  $J$  = 1.8 Hz, 1H), 7.28 (d,  $J$  = 16.0 Hz, 1H), 6.67 (d,  $J$  = 3.5 Hz, 1H), 6.61 (dd,  $J$  = 15.9, 1.6 Hz, 1H), 6.49 (dt,  $J$  = 3.3, 1.6 Hz, 1H), 2.32 (d,  $J$  = 1.5 Hz, 3H);  $^{13}\text{C}$  NMR (600 MHz, Chloroform-*d*):  $\delta$  = 197.74, 150.87, 145.01, 129.39, 124.28, 115.62, 112.53, 30.85, 27.78; HRMS (ESI):  $m/z$  calculated for  $\text{C}_8\text{H}_8\text{O}_2$   $[\text{M} + \text{Na}]^+$ : 159.0417; found: 159.0417.

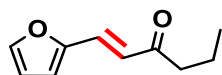

**1-(furan-2-yl)hex-1-en-3-one (C10):** The crude product was purified by TLC isolation with eluent (petroleum ether : acetone = 30: 1) to afford **C10** in 65.4% yield (107 mg);  $^1\text{H}$  NMR (400 MHz, Chloroform-*d*):  $\delta$  = 7.46 (d,  $J$  = 1.8 Hz, 1H), 7.29 (d,  $J$  = 15.9 Hz, 1H), 6.68-6.55 (m, 2H), 6.45 (dd,  $J$  = 3.4, 1.8 Hz, 1H), 2.55 (t,  $J$  = 7.4 Hz, 2H), 1.66 (h,  $J$  = 7.4 Hz, 2H), 0.93 (t,  $J$  = 7.4 Hz, 3H);  $^{13}\text{C}$  NMR (400 MHz, Chloroform-*d*):  $\delta$  = 200.23, 151.21, 144.89, 128.56, 123.50, 115.62, 112.59, 43.39, 17.91 13.91; HRMS (ESI):  $m/z$  calculated for  $\text{C}_{10}\text{H}_{12}\text{O}_2$   $[\text{M} + \text{Na}]^+$ : 187.0730; found: 187.0723.

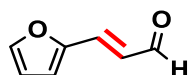

**3-(furan-2-yl)acrylaldehyde (C7):** The crude product was purified by TLC isolation with eluent (petroleum ether : ethyl acetate = 3 : 1) to afford **C7** in 74.3% yield (91 mg);  $^1\text{H}$  NMR (400 MHz, Chloroform-*d*):  $\delta$  = 9.62 (d,  $J$  = 7.9 Hz, 1H),

7.57 (s, 1H), 7.23 (d,  $J = 15.7$  Hz, 1H), 6.78 (d,  $J = 3.5$  Hz, 1H), 6.66-6.49 (m, 2H);  $^{13}\text{C}$  NMR (400 MHz, Chloroform-*d*):  $\delta = 192.90, 150.60, 145.93, 137.83, 126.00, 116.75, 112.89$ ; HRMS (ESI):  $m/z$  calculated for  $\text{C}_7\text{H}_6\text{O}_2$   $[\text{M} + \text{Na}]^+$ : 145.0260; found: 145.0256.

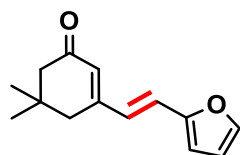

**6-(furan-2-ylmethylene)-3,5,5-trimethylcyclohex-2-en-1-one (C14):** The crude product was purified by TLC isolation with eluent (n-hexane : acetone = 10 : 1) to afford **C14** in 82.0% yield (177 mg);  $^1\text{H}$  NMR (400 MHz, Chloroform-*d*):  $\delta = 7.41$  (d,  $J = 1.8$  Hz, 1H), 6.90-6.67 (m, 2H), 6.53-6.31 (m, 2H), 6.01 (s, 1H), 2.36 (s, 2H), 2.25 (s, 2H), 1.05 (s, 6H);  $^{13}\text{C}$  NMR (400 MHz, Chloroform-*d*):  $\delta = 200.16, 154.49, 152.39, 143.81, 127.76, 126.95, 122.18, 112.27, 112.03, 51.45, 38.83, 33.37, 28.55$ ; HR-MS (ESI):  $m/z$  calculated for  $\text{C}_{14}\text{H}_{16}\text{O}_2$   $[\text{M} + \text{Na}]^+$ : 239.1043; found: 239.1033.

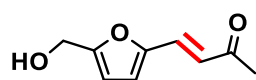

**4-(5-(hydroxymethyl)furan-2-yl)but-3-en-2-one (C9):** The crude product was purified by TLC isolation with eluent (n-hexane: ethyl acetate = 1 : 1) to afford **C9** in 99.1% yield (164 mg);  $^1\text{H}$  NMR (400 MHz, Chloroform-*d*):  $\delta = 7.41$  (d,  $J = 15.6$  Hz, 1H), 6.88 (d,  $J = 15.6$  Hz, 1H), 6.62 (d,  $J = 3.4$  Hz, 1H), 6.39 (d,  $J = 3.4$  Hz, 1H), 4.76-3.82 (m, 3H), 2.09 (d,  $J = 50.9$  Hz, 3H);  $^{13}\text{C}$  NMR (400 MHz, Chloroform-*d*):  $\delta = 197.92, 156.92, 150.90, 129.32, 124.26, 116.69, 110.54, 57.71, 28.10$ ; HRMS (ESI):  $m/z$  calculated for  $\text{C}_9\text{H}_{10}\text{O}_3$   $[\text{M} + \text{Na}]^+$ : 189.0522; found:



189.0522.

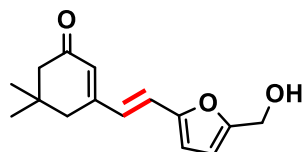

**6-((5-(hydroxymethyl)furan-2-yl)methylene)-3,5,5-trimethylcyclohex-2-en-1-one**

**(C15a):** The crude product was purified by TLC isolation with eluent (petroleum ether : ethyl acetate = 3 : 1) to afford **C15a** in 71.5% yield (175 mg);  $^1\text{H}$  NMR (400 MHz, Chloroform-*d*):  $\delta$  = 6.72 (q,  $J$  = 16.0 Hz, 2H), 6.37 (d,  $J$  = 3.3 Hz, 1H), 6.29 (d,  $J$  = 3.4 Hz, 1H), 5.96 (s, 1H), 4.58 (s, 2H), 3.38 (s, 1H), 2.32 (s, 2H), 2.20 (s, 2H), 1.01 (s, 6H);  $^{13}\text{C}$  NMR (400 MHz, Chloroform-*d*):  $\delta$  = 200.70, 156.11, 155.09, 152.11, 127.50, 126.63, 122.32, 113.23, 110.19, 57.41, 51.28, 38.78, 33.35, 28.49; HRMS (ESI):  $m/z$  calculated for  $\text{C}_{15}\text{H}_{18}\text{O}_3$   $[\text{M} + \text{Na}]^+$ : 269.1148; found: 269.1143.

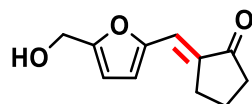

**2-((5-(hydroxymethyl)furan-2-yl)methylene)cyclopentan-1-one (C11):** The crude product was purified by TLC isolation with eluent (petroleum ether : ethyl acetate = 2 : 1) to afford **C11** in 91.2% yield (175 mg);  $^1\text{H}$  NMR (400 MHz, Chloroform-*d*):  $\delta$  = 6.96 (t,  $J$  = 2.8 Hz, 1H), 6.49 (d,  $J$  = 3.5 Hz, 1H), 6.29 (d,  $J$  = 3.5 Hz, 1H), 4.52 (s, 2H), 4.07 (s, 1H), 2.81 (td,  $J$  = 7.4, 2.7 Hz, 2H), 2.23 (t,  $J$  = 7.9 Hz, 2H), 1.88 (d,  $J$  = 7.6 Hz, 2H);  $^{13}\text{C}$  NMR (400 MHz, Chloroform-*d*):  $\delta$  = 208.65, 157.48, 151.73, 133.32, 119.15, 117.25, 110.32, 57.36, 38.03, 29.09, 19.68; HRMS (ESI):  $m/z$  calculated for  $\text{C}_{11}\text{H}_{12}\text{O}_3$   $[\text{M} + \text{Na}]^+$ : 215.0679; found: 215.0674.

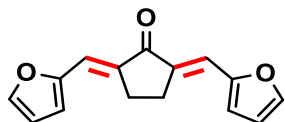

**2,5-bis(furan-2-ylmethylene)cyclopentan-1-one (C15b):** The crude product was purified by TLC isolation with eluent (petroleum ether : ethyl acetate = 15 : 1) to afford **C15b** in 24.9% yield (60 mg);  $^1\text{H}$  NMR (600 MHz, Chloroform-*d*):  $\delta$  = 7.59 (s, 2H), 7.35 (s, 2H), 6.70 (s, 2H), 6.54 (d,  $J$  = 1.7 Hz, 2H), 3.08 (s, 4H);  $^{13}\text{C}$  NMR (400 MHz, Chloroform-*d*):  $\delta$  = 195.39, 152.79, 145.04, 135.90, 119.85, 115.95, 112.63, 53.42, 25.81; HRMS (ESI):  $m/z$  calculated for  $\text{C}_{15}\text{H}_{12}\text{O}_3$   $[\text{M} + \text{Na}]^+$ : 263.0682; found: 263.0679.

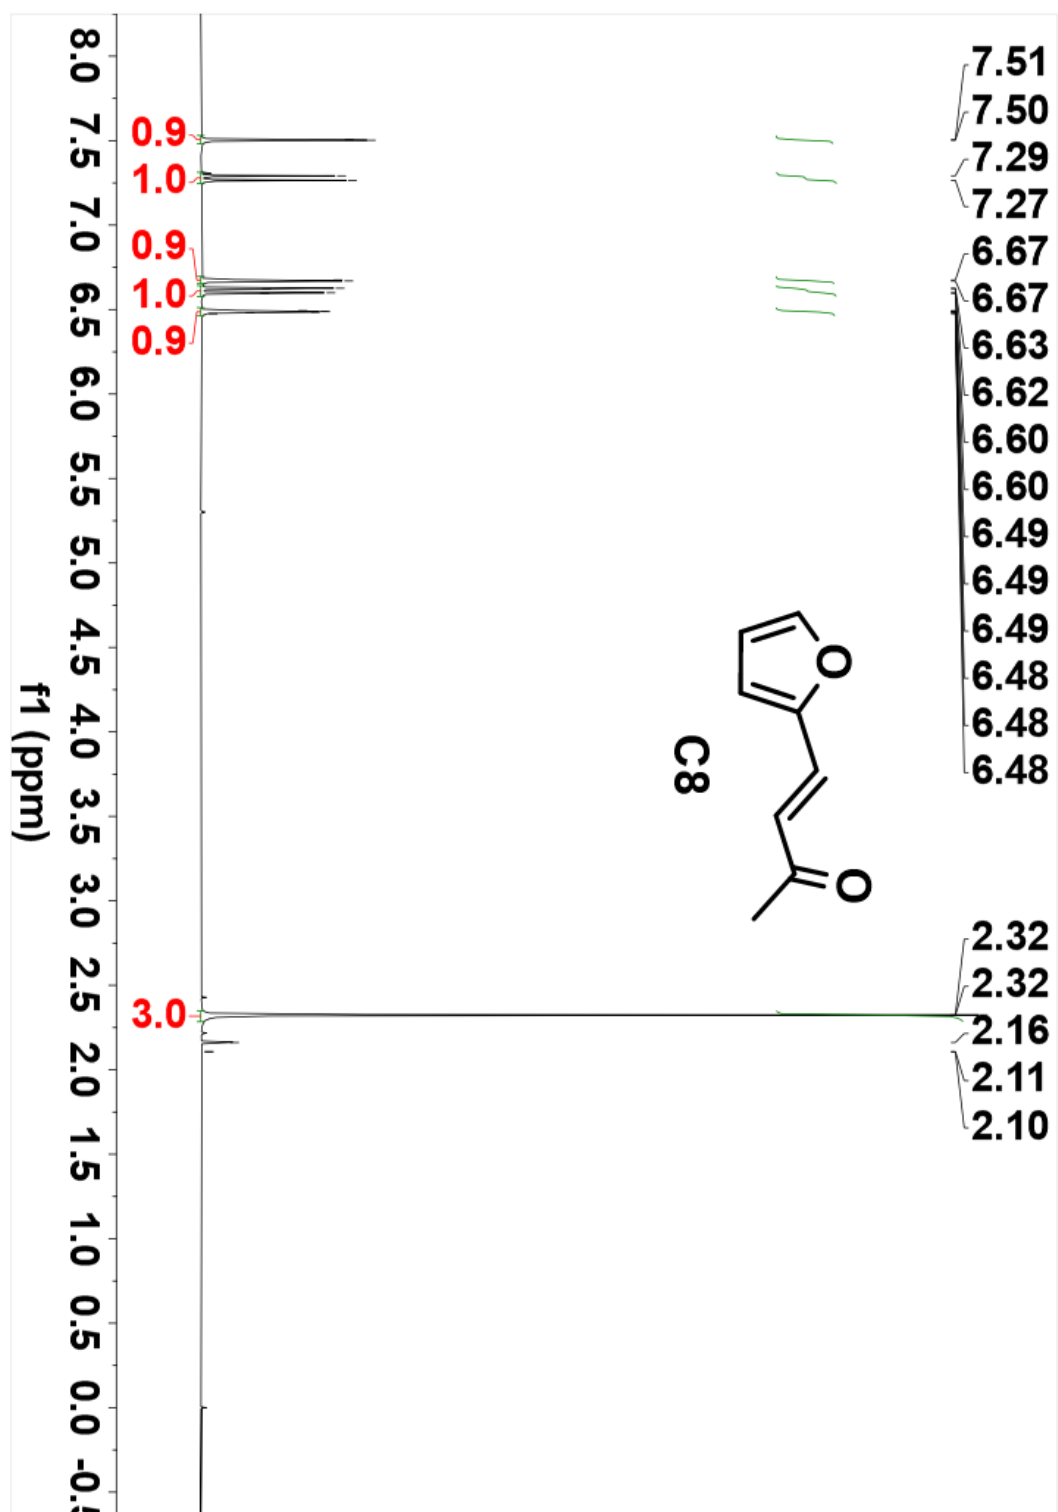

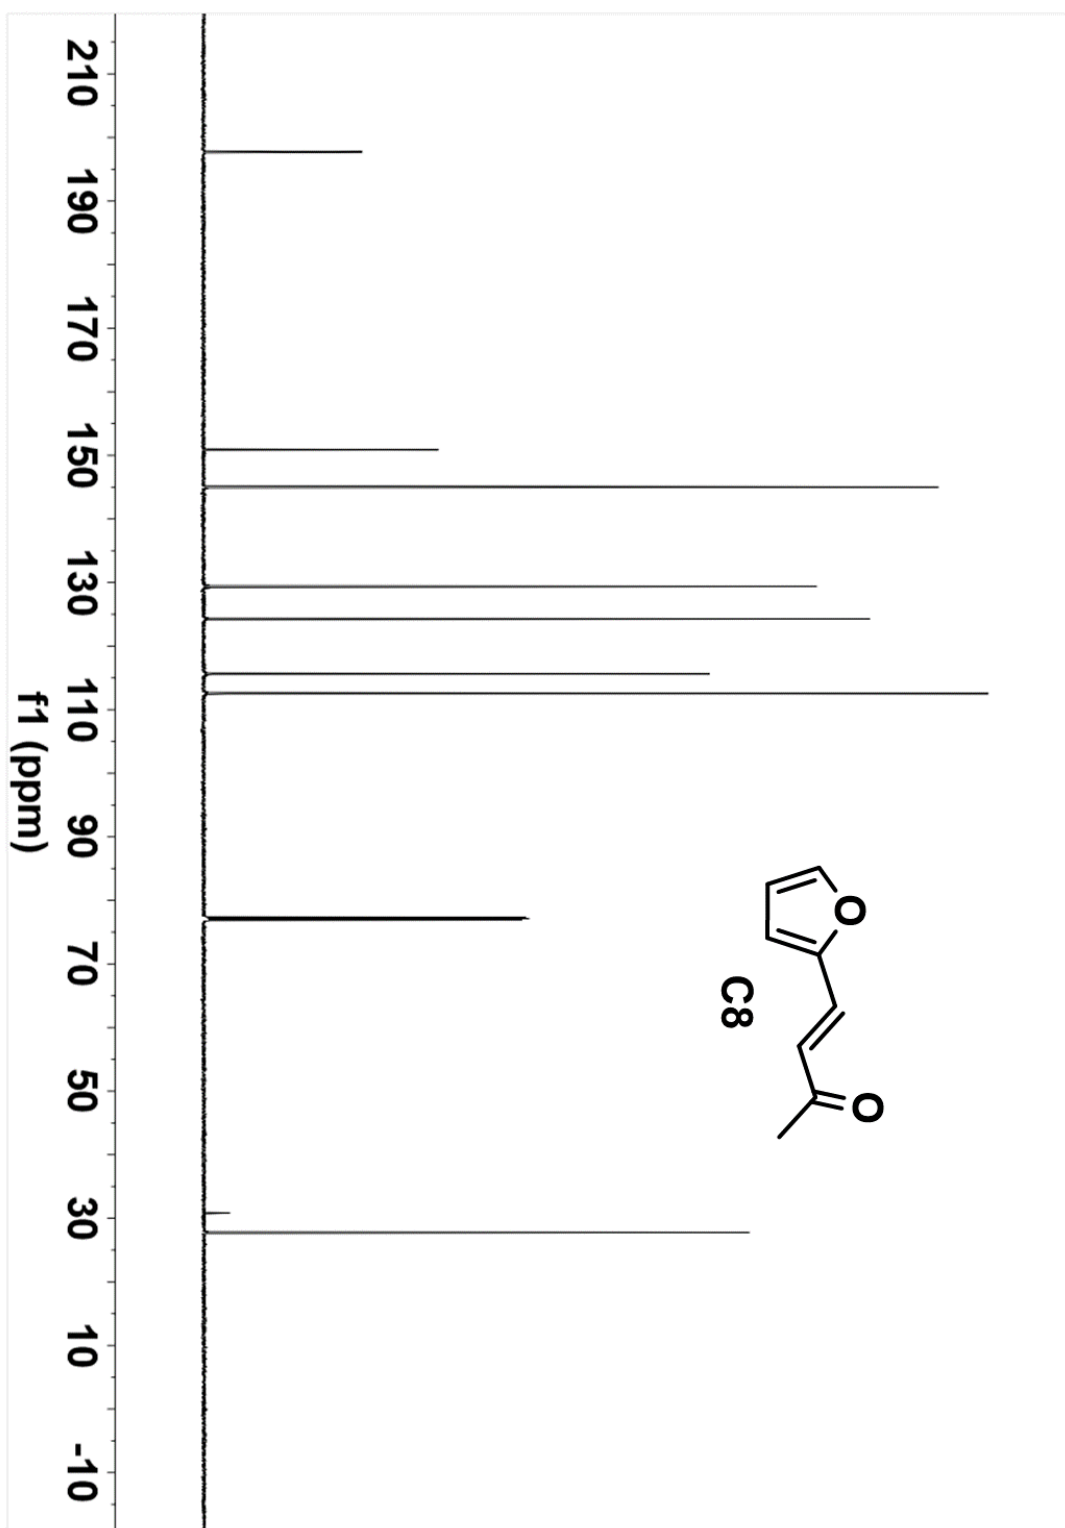

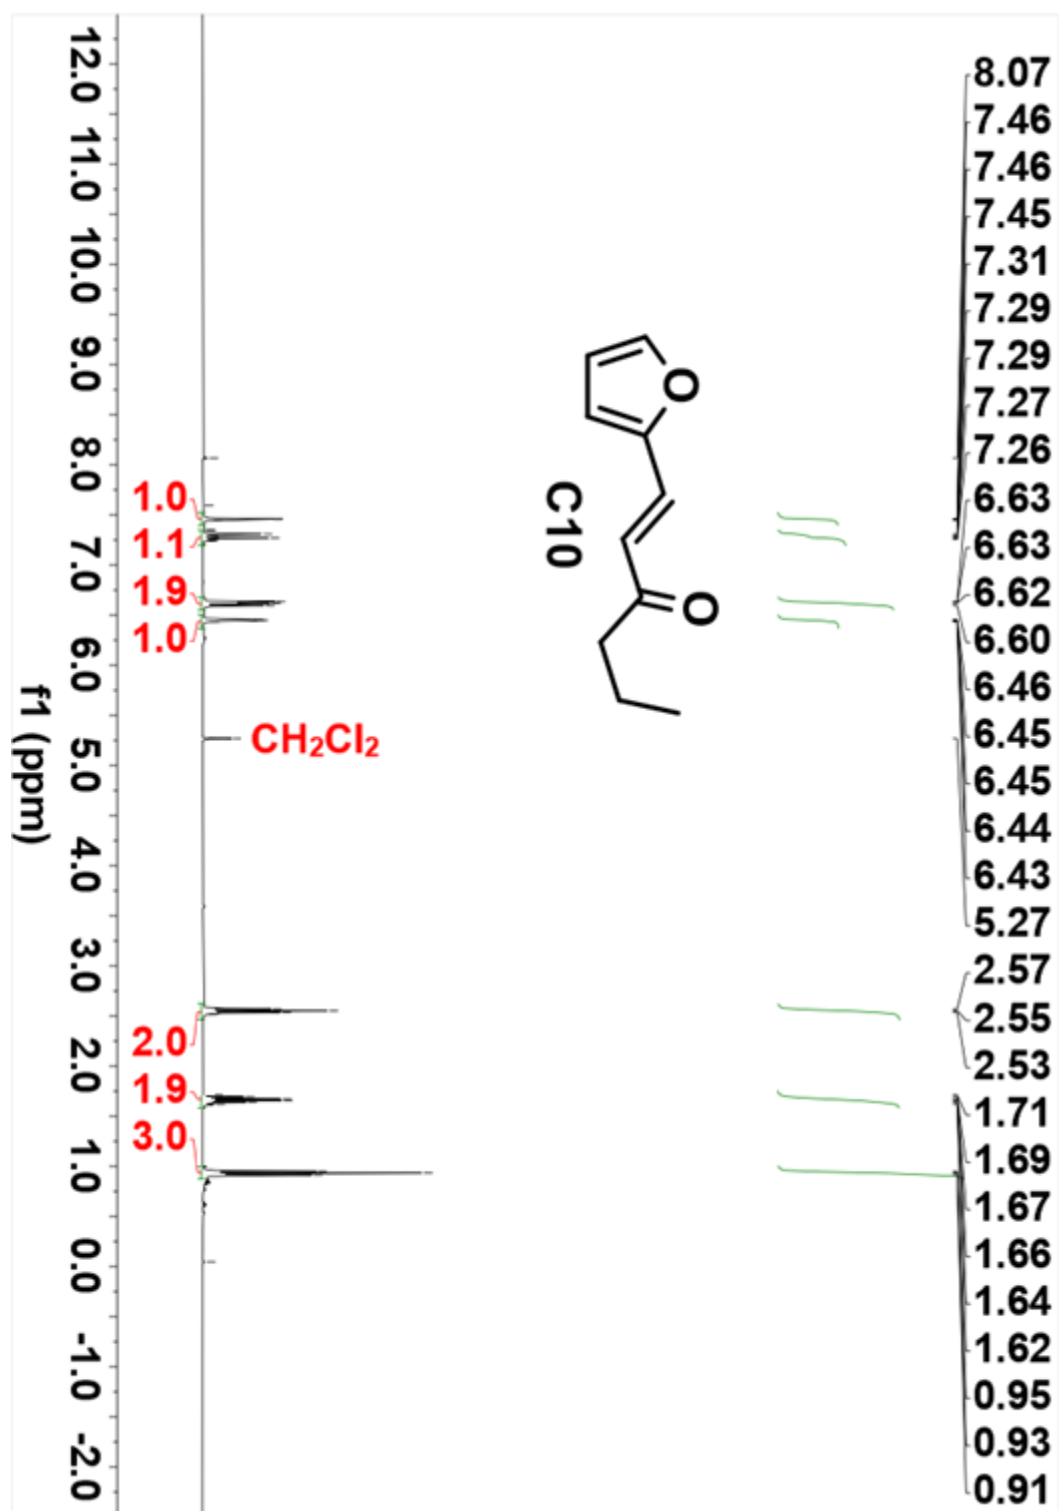

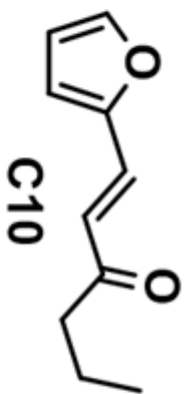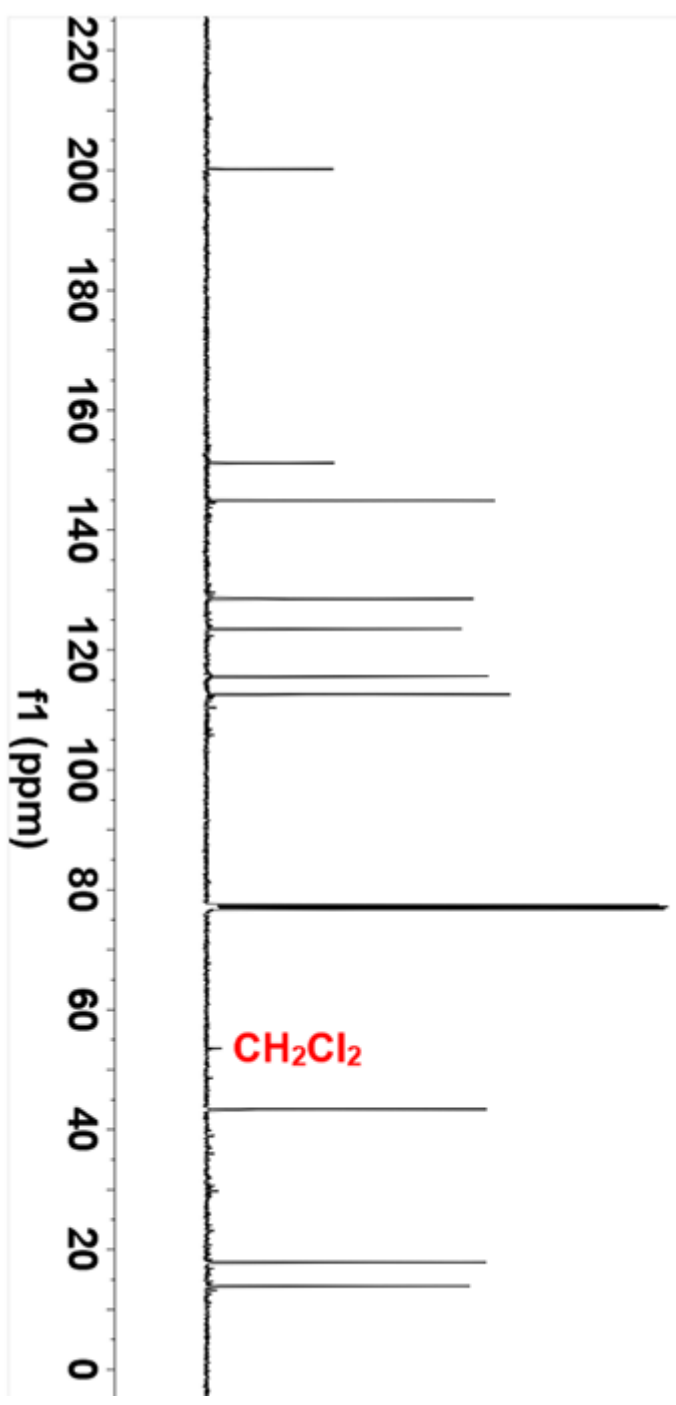

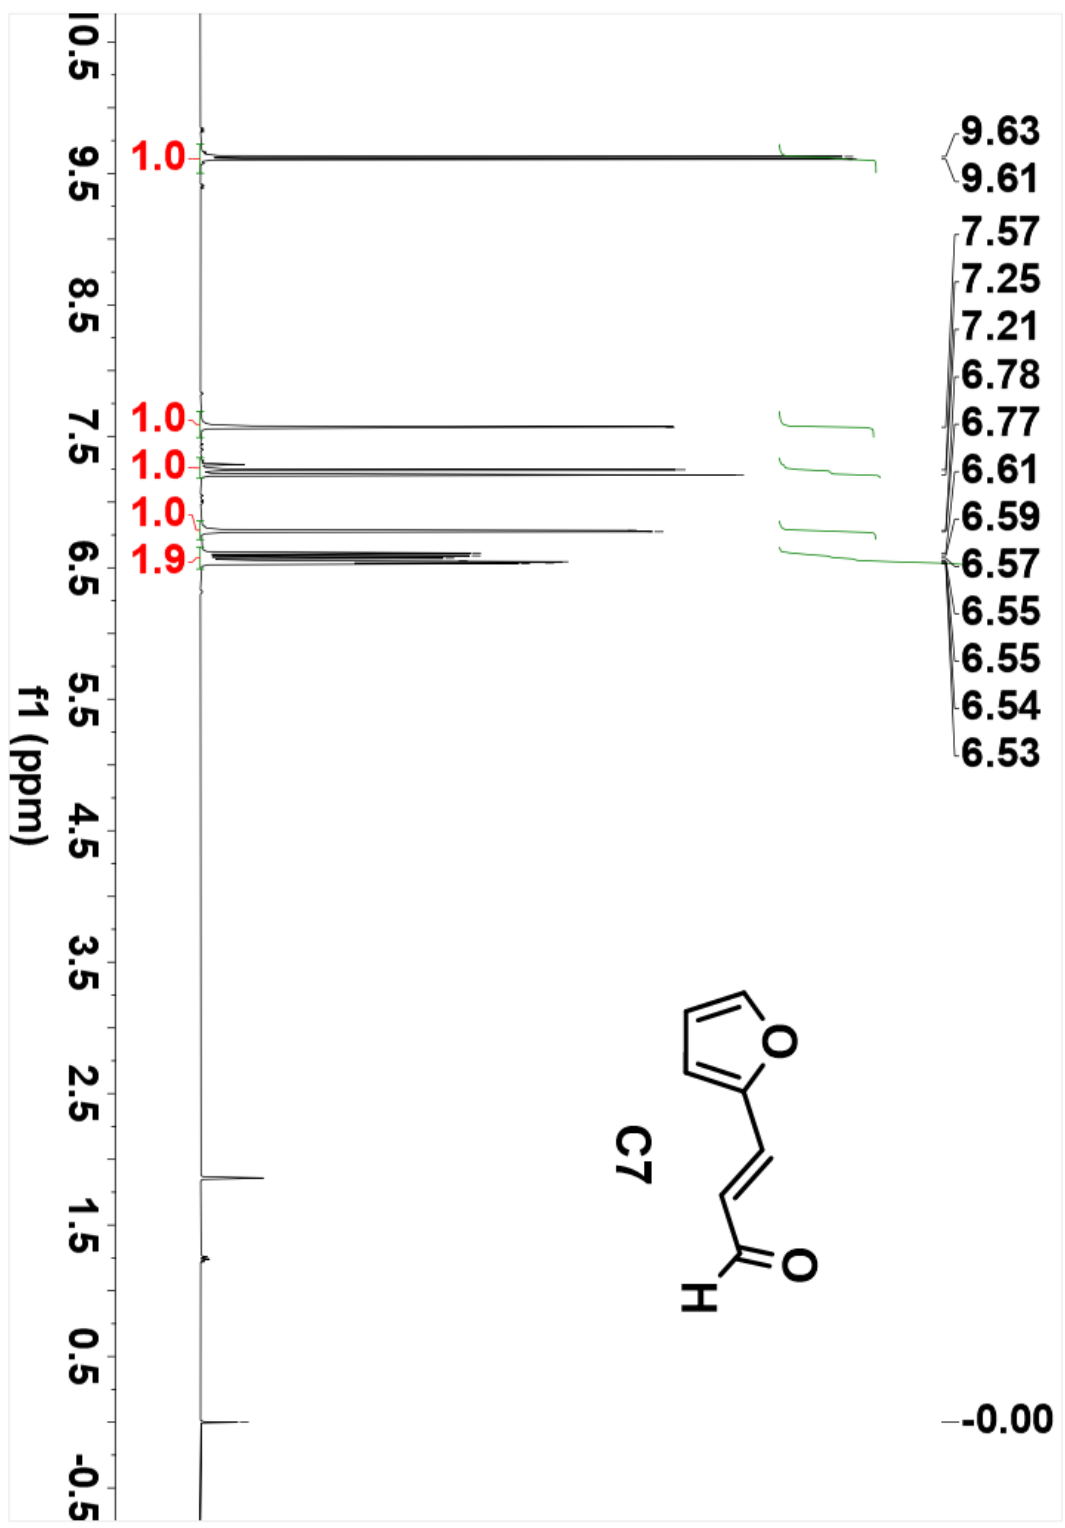

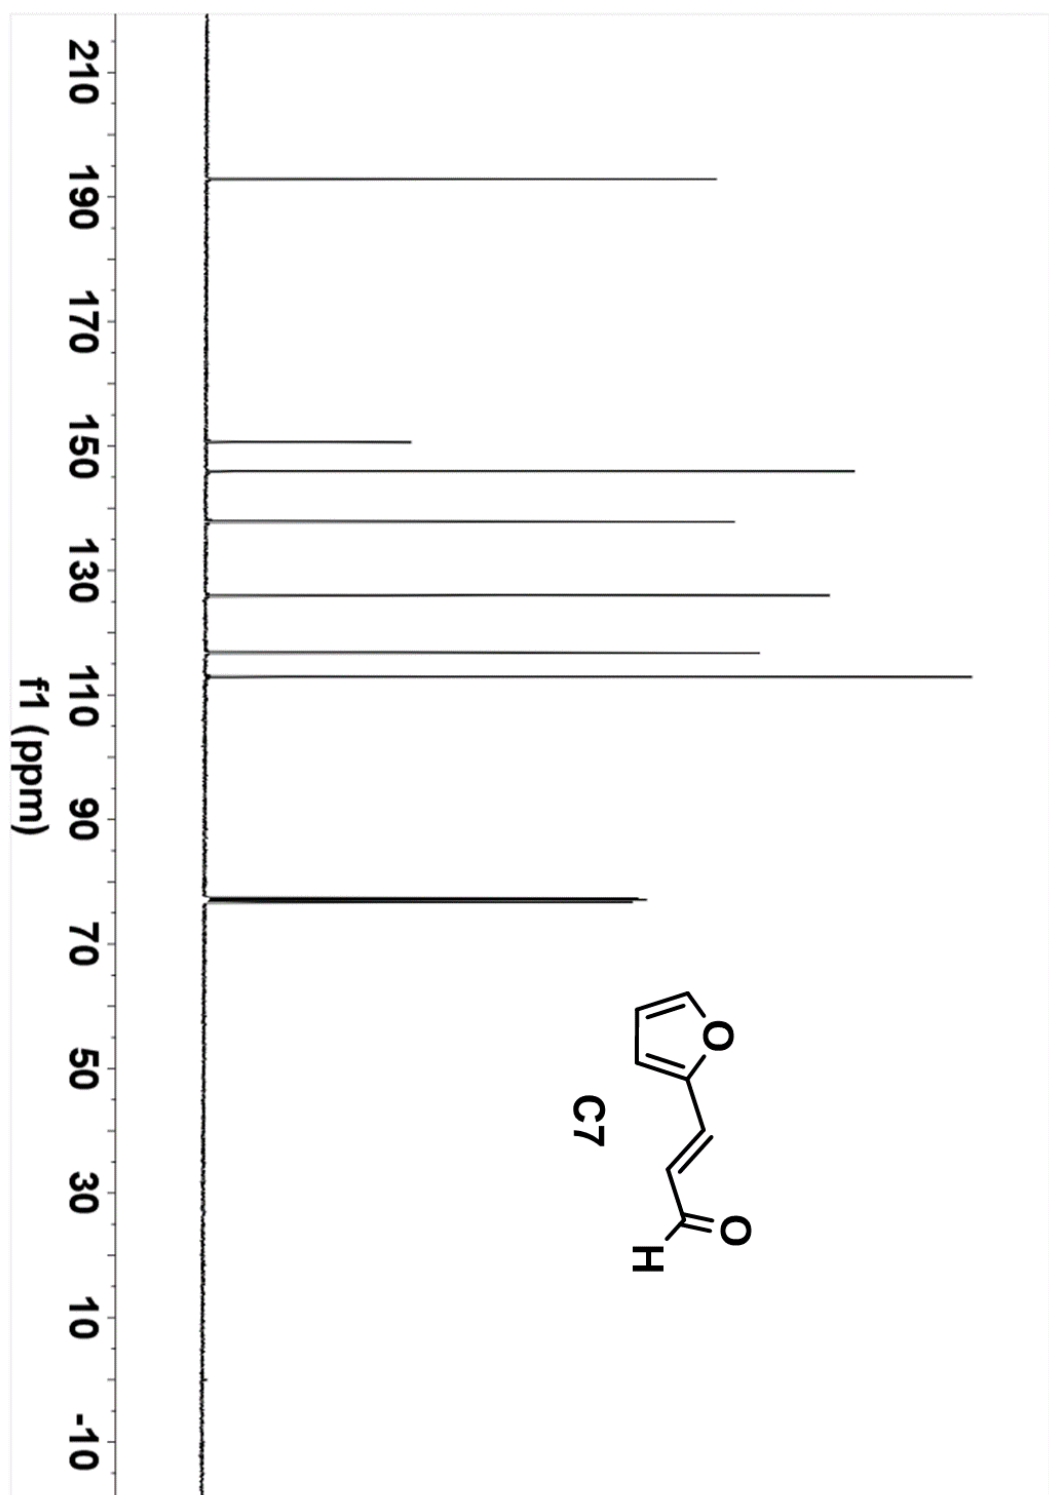



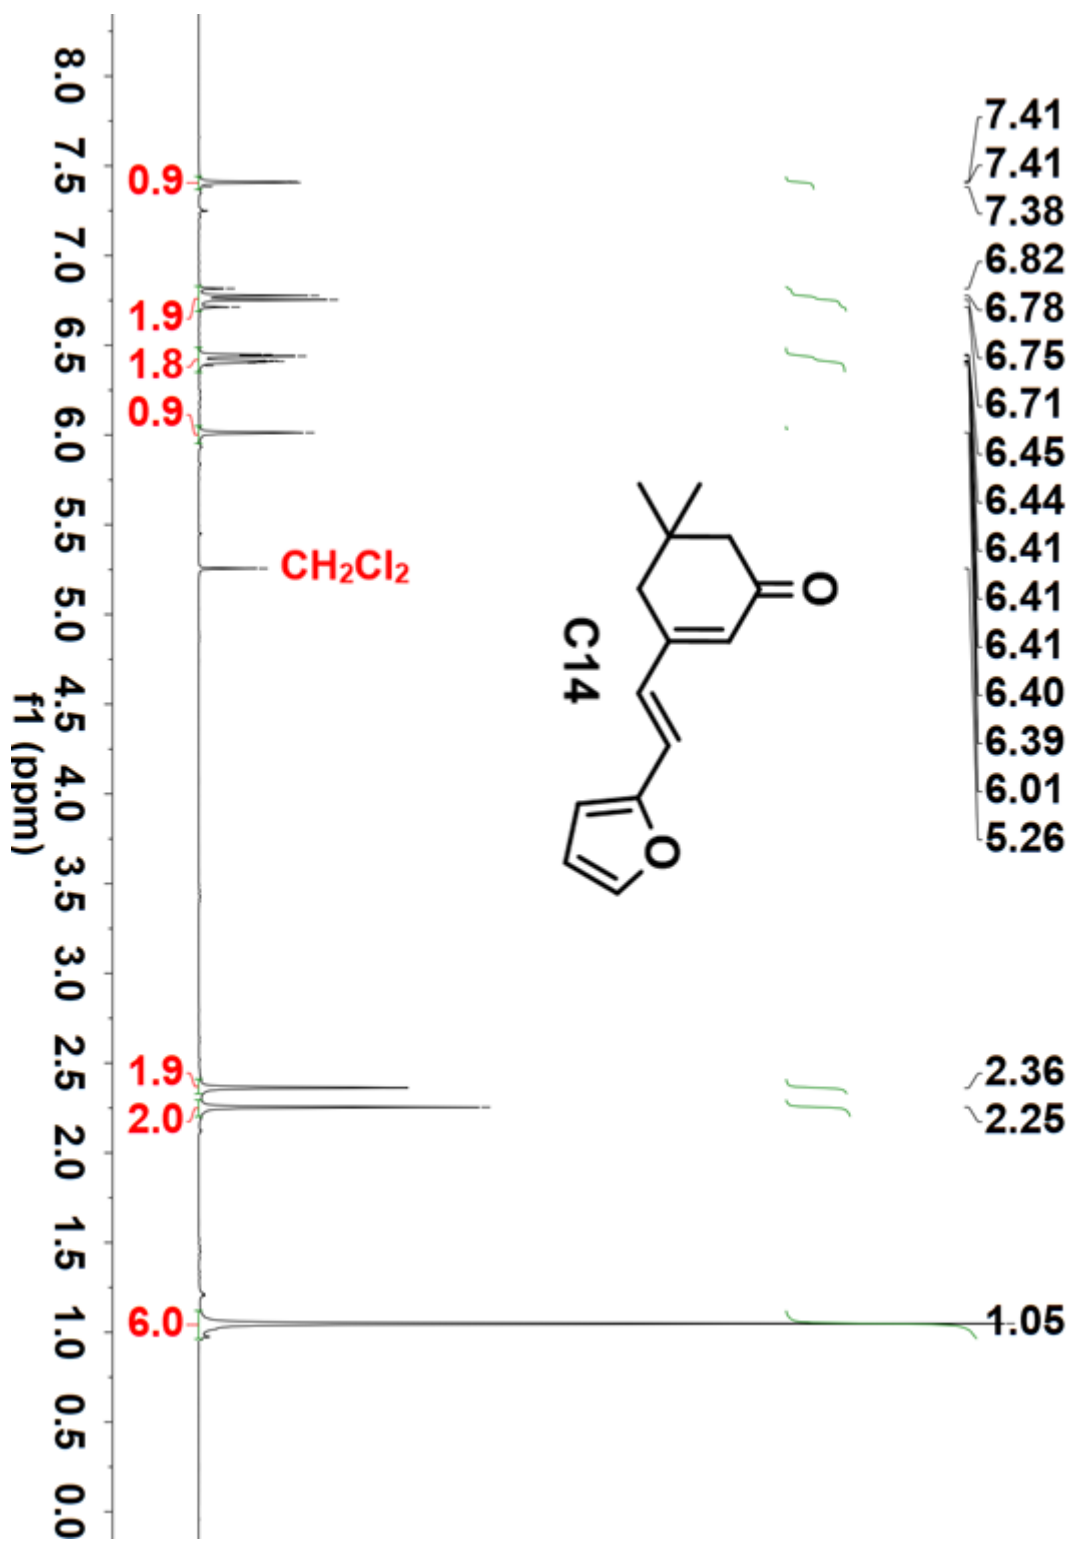

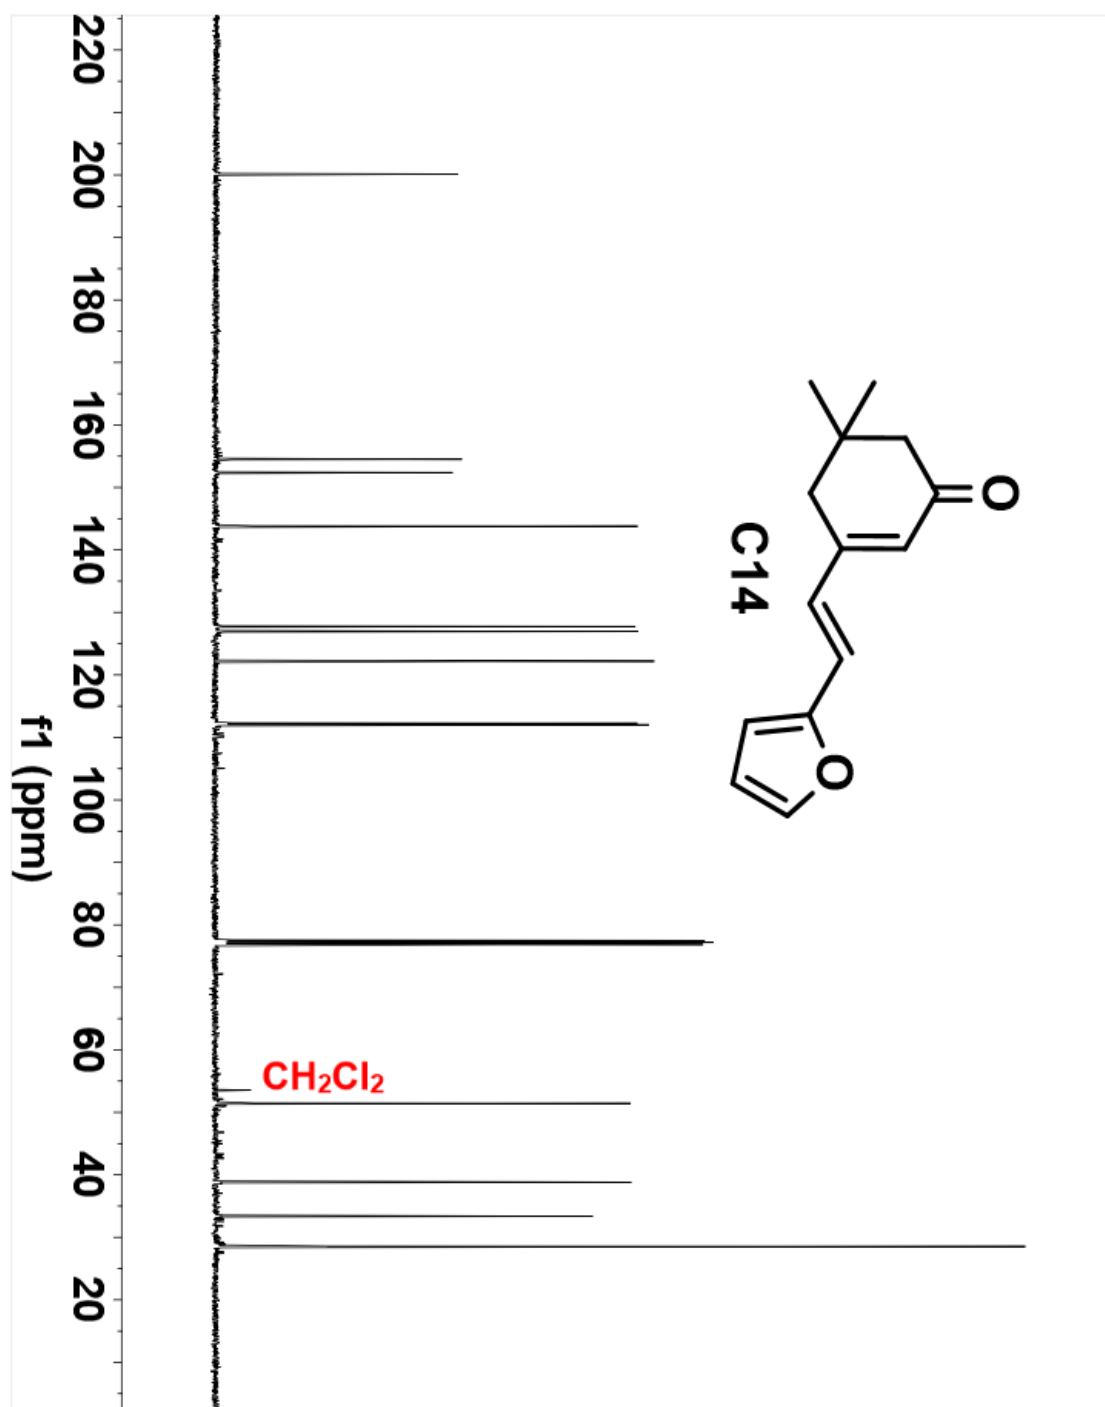

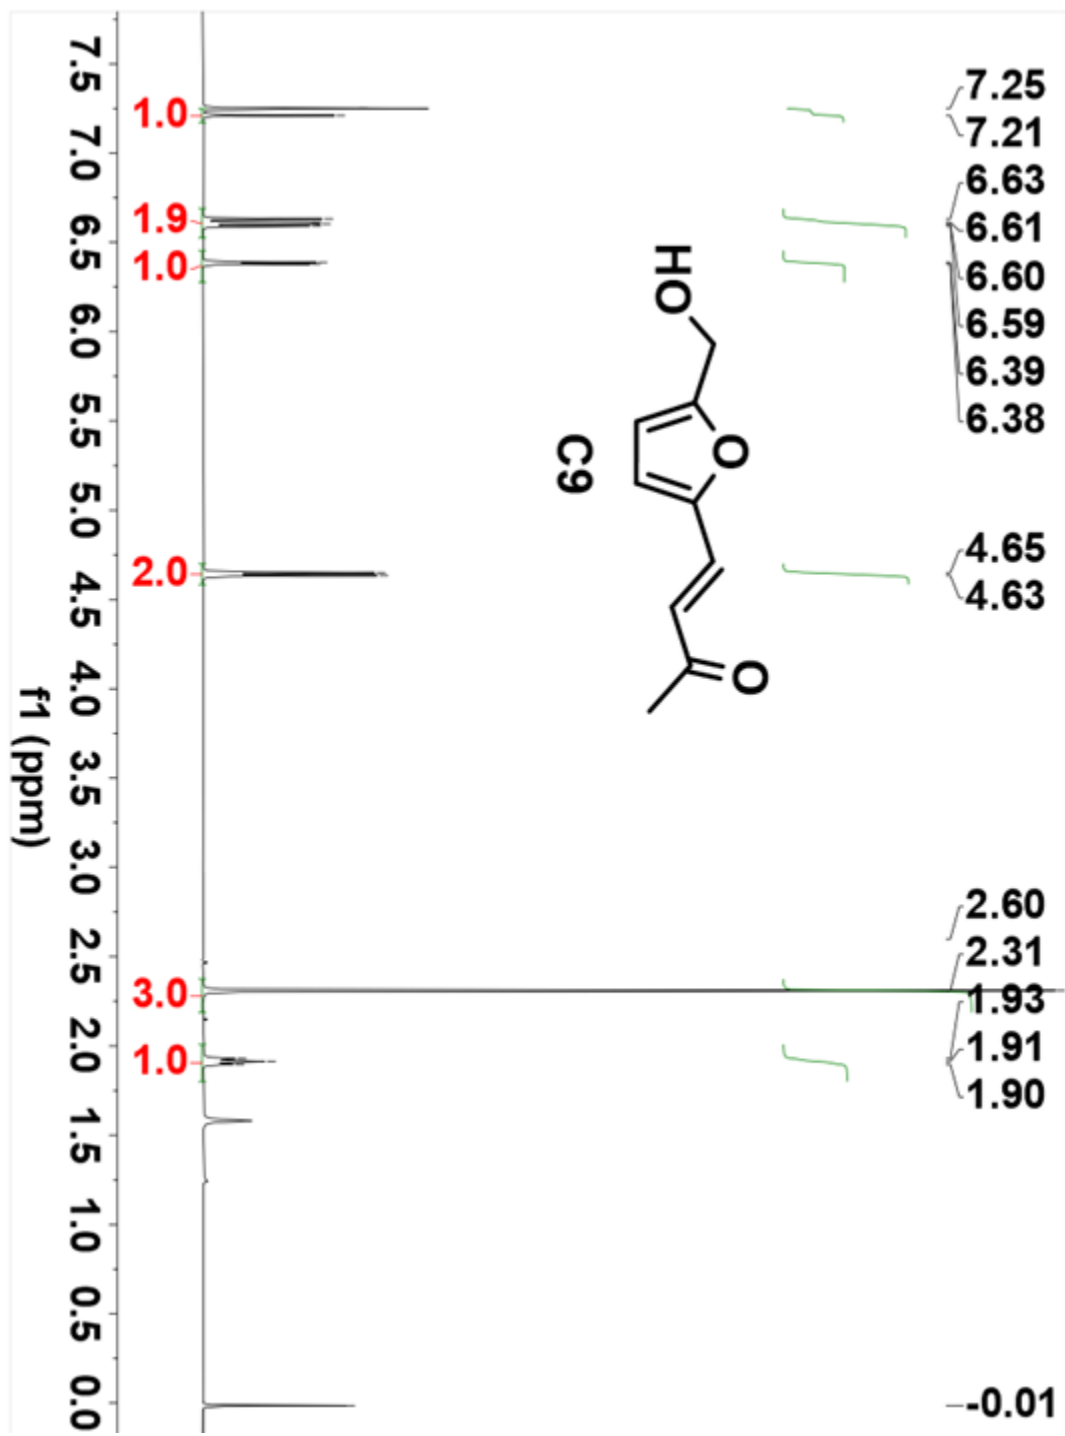

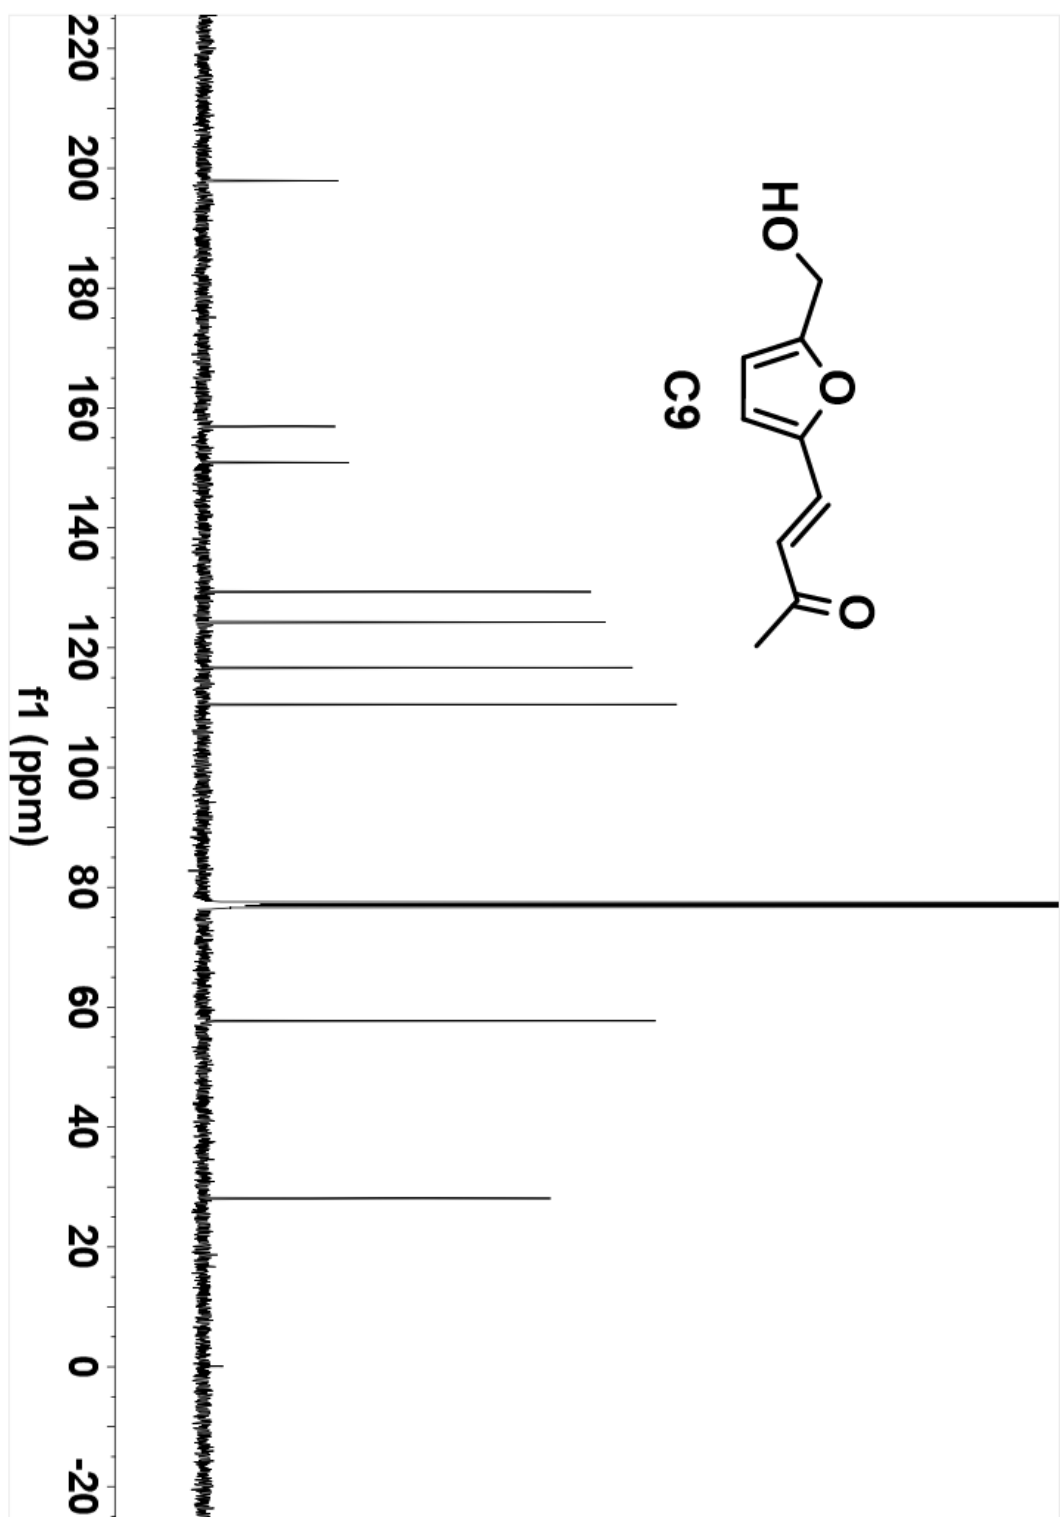

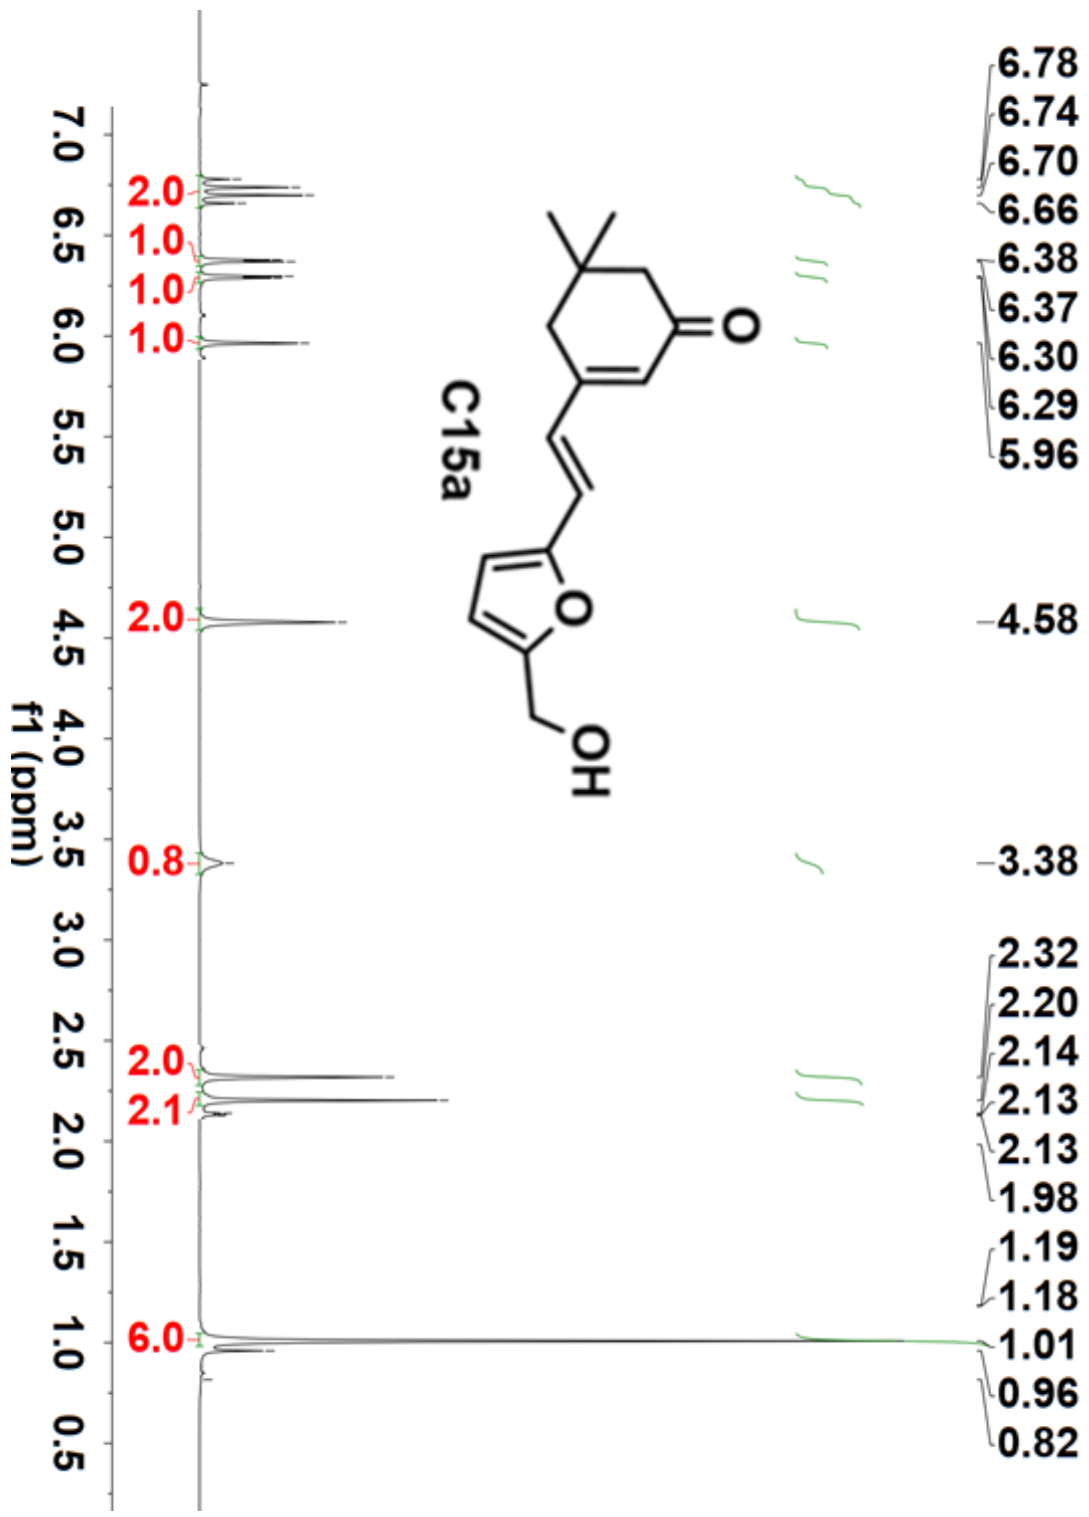

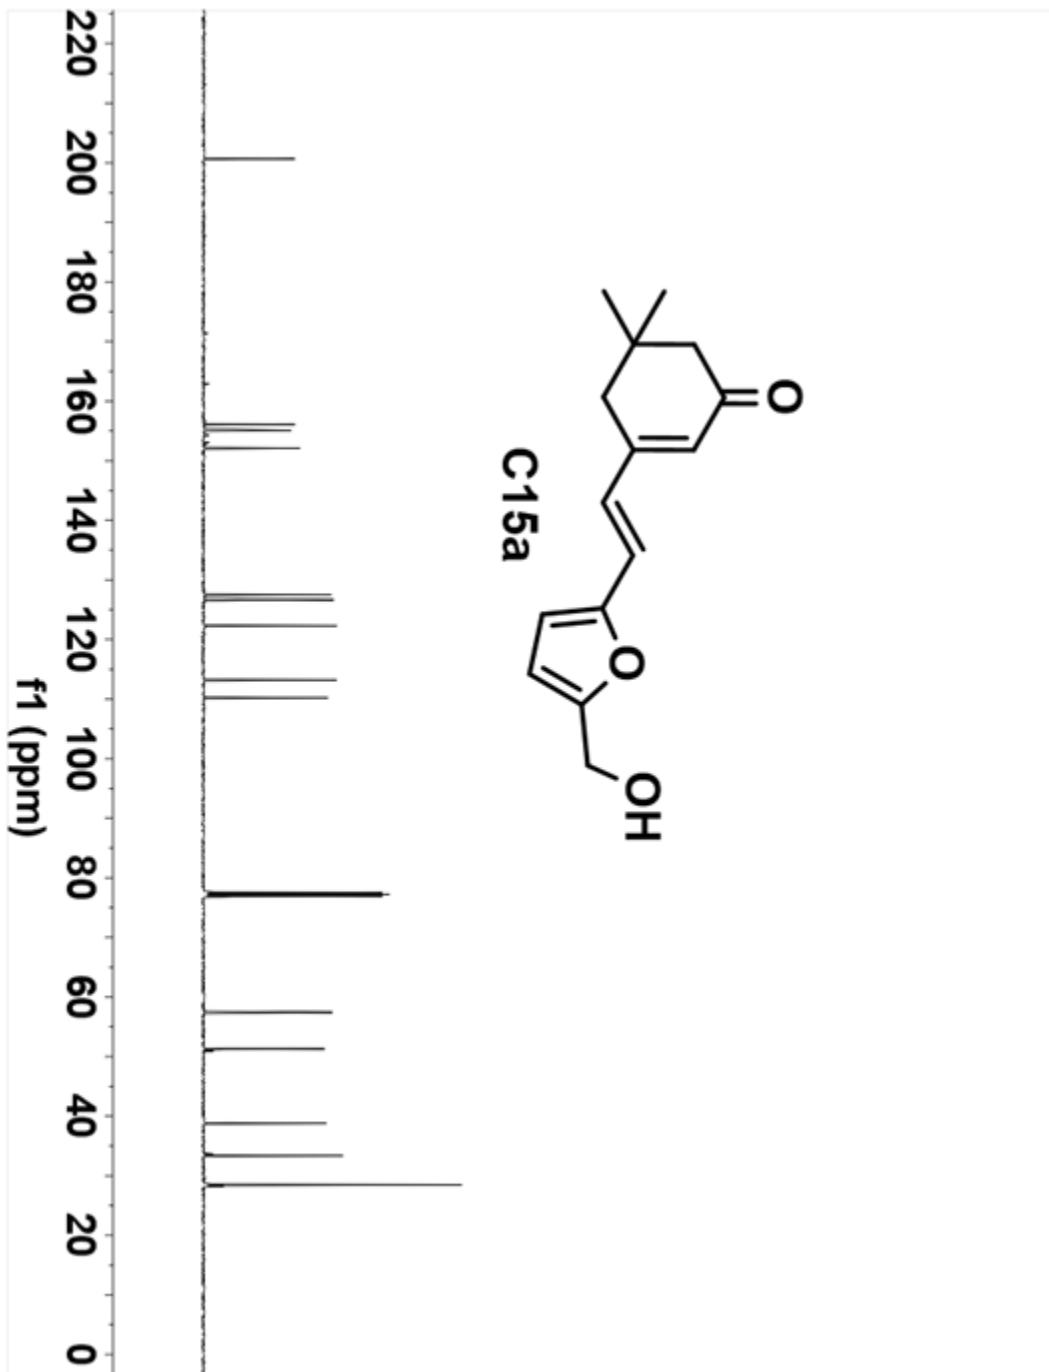

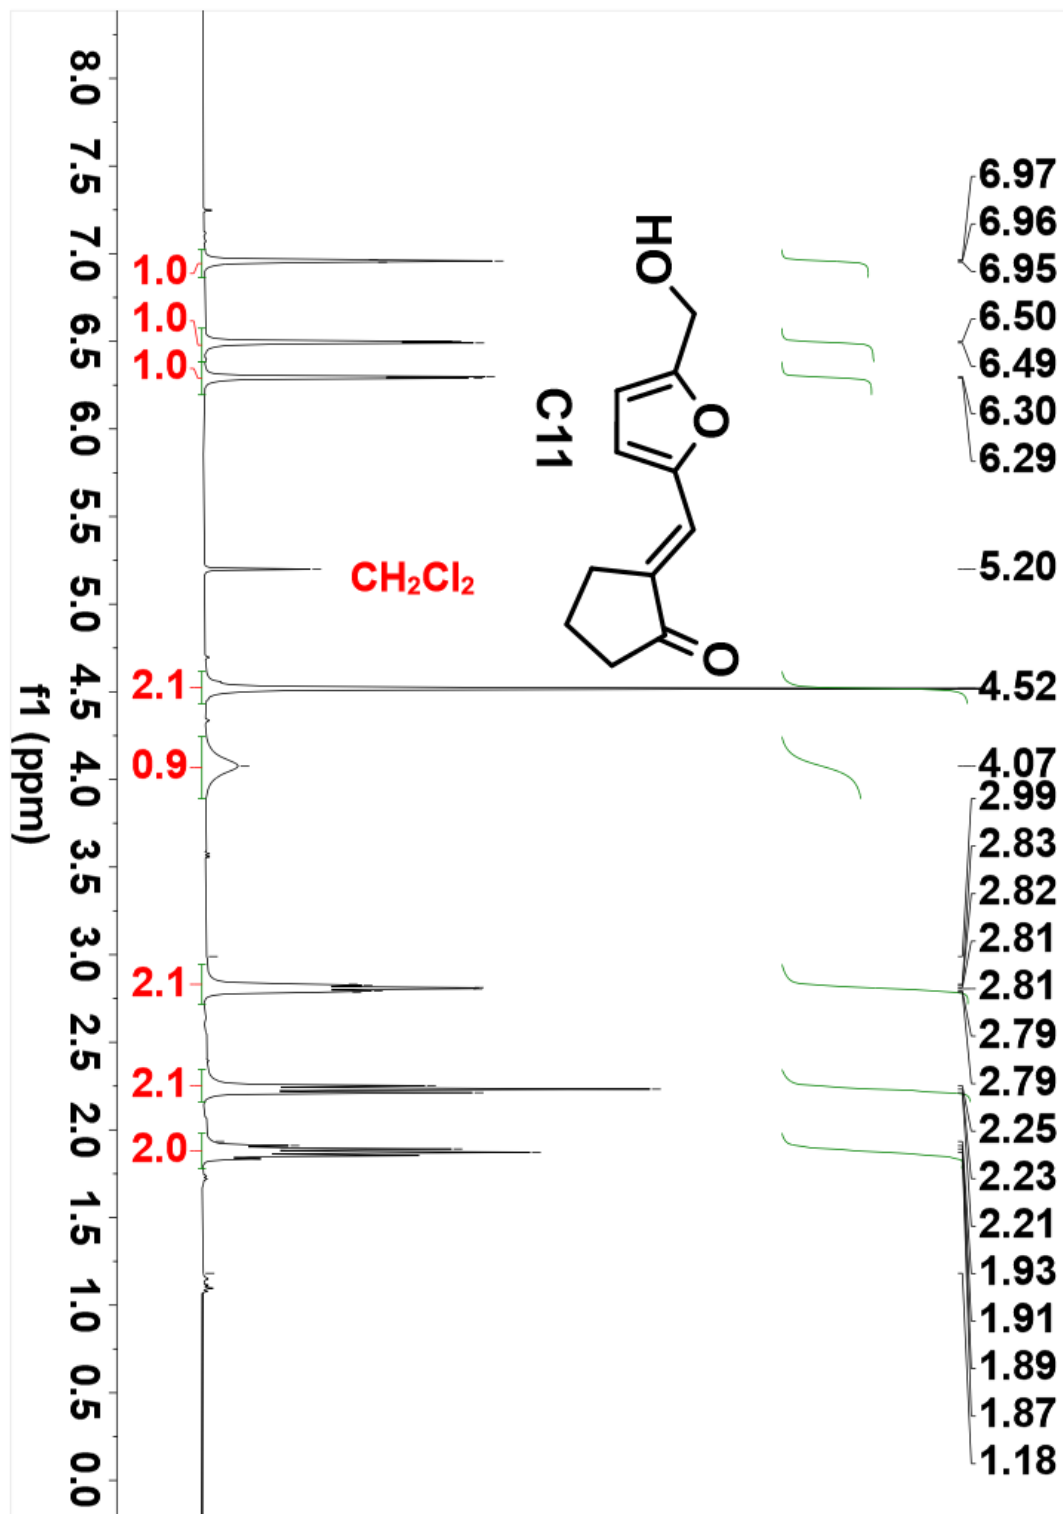

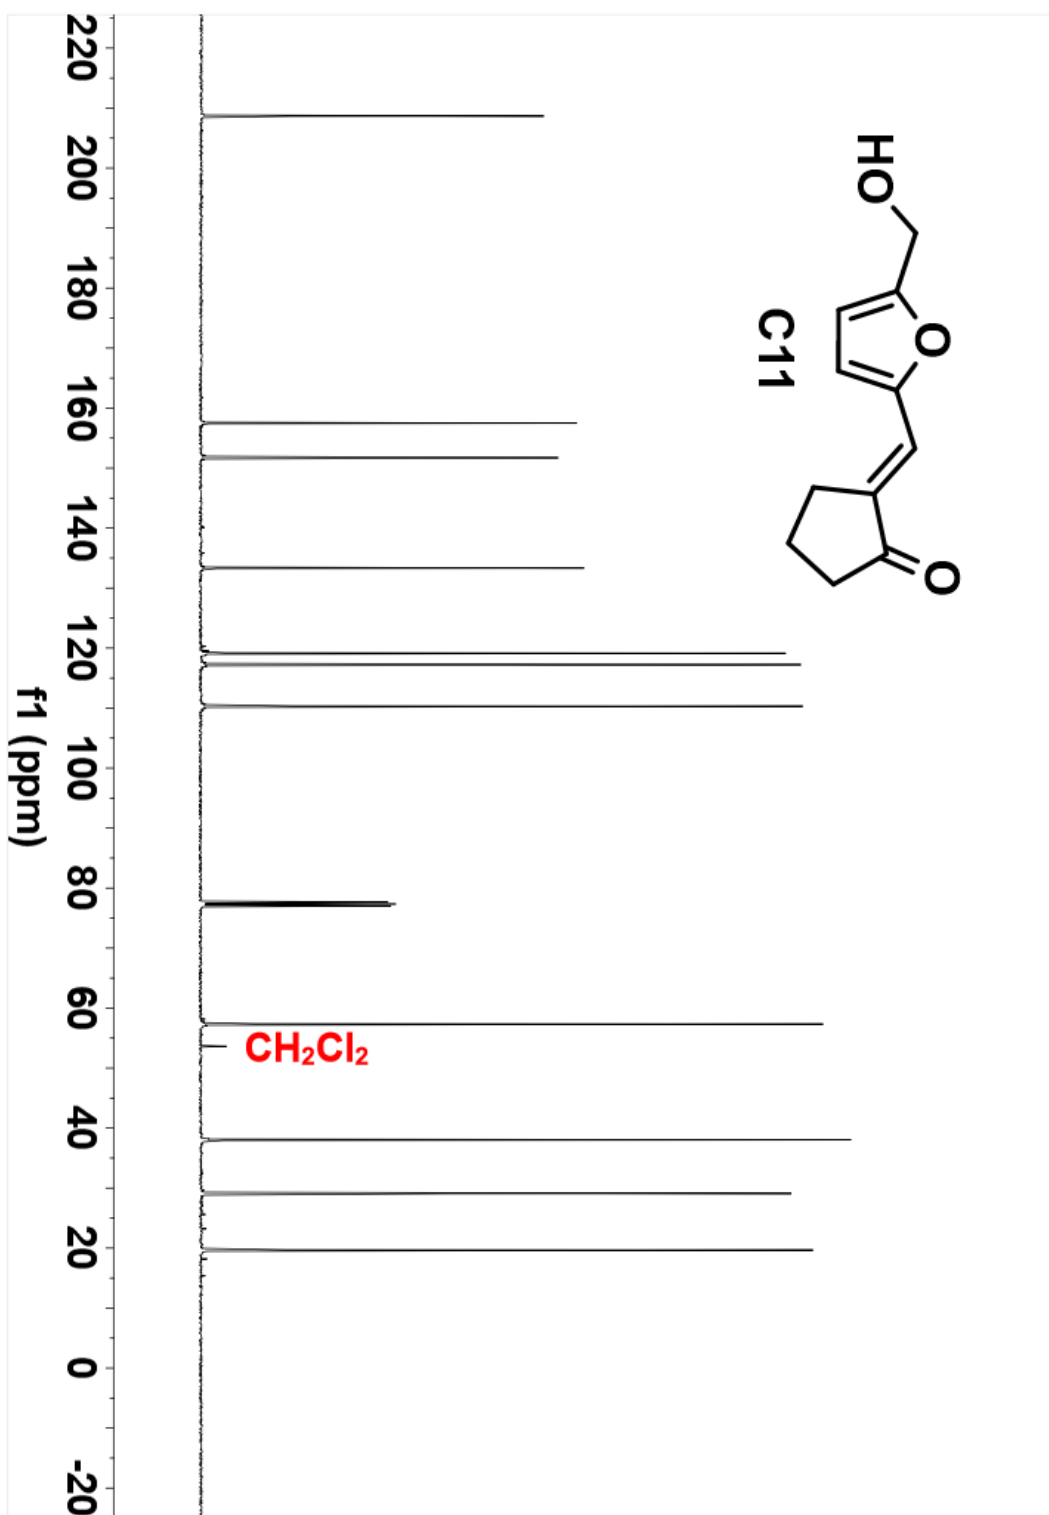



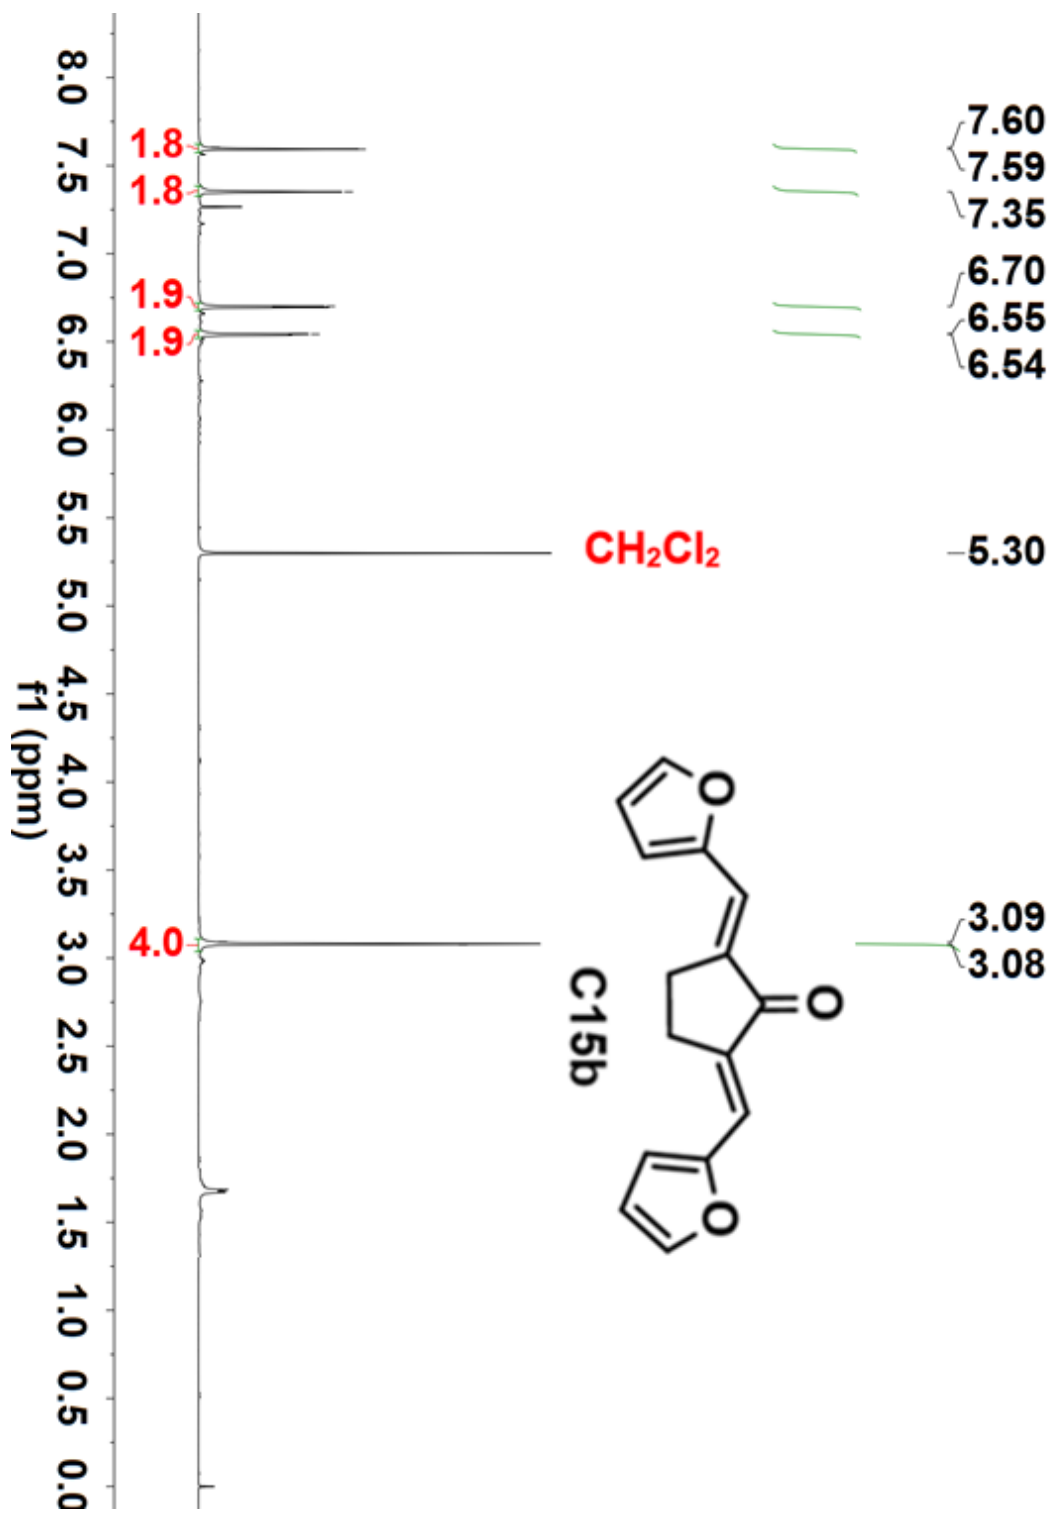

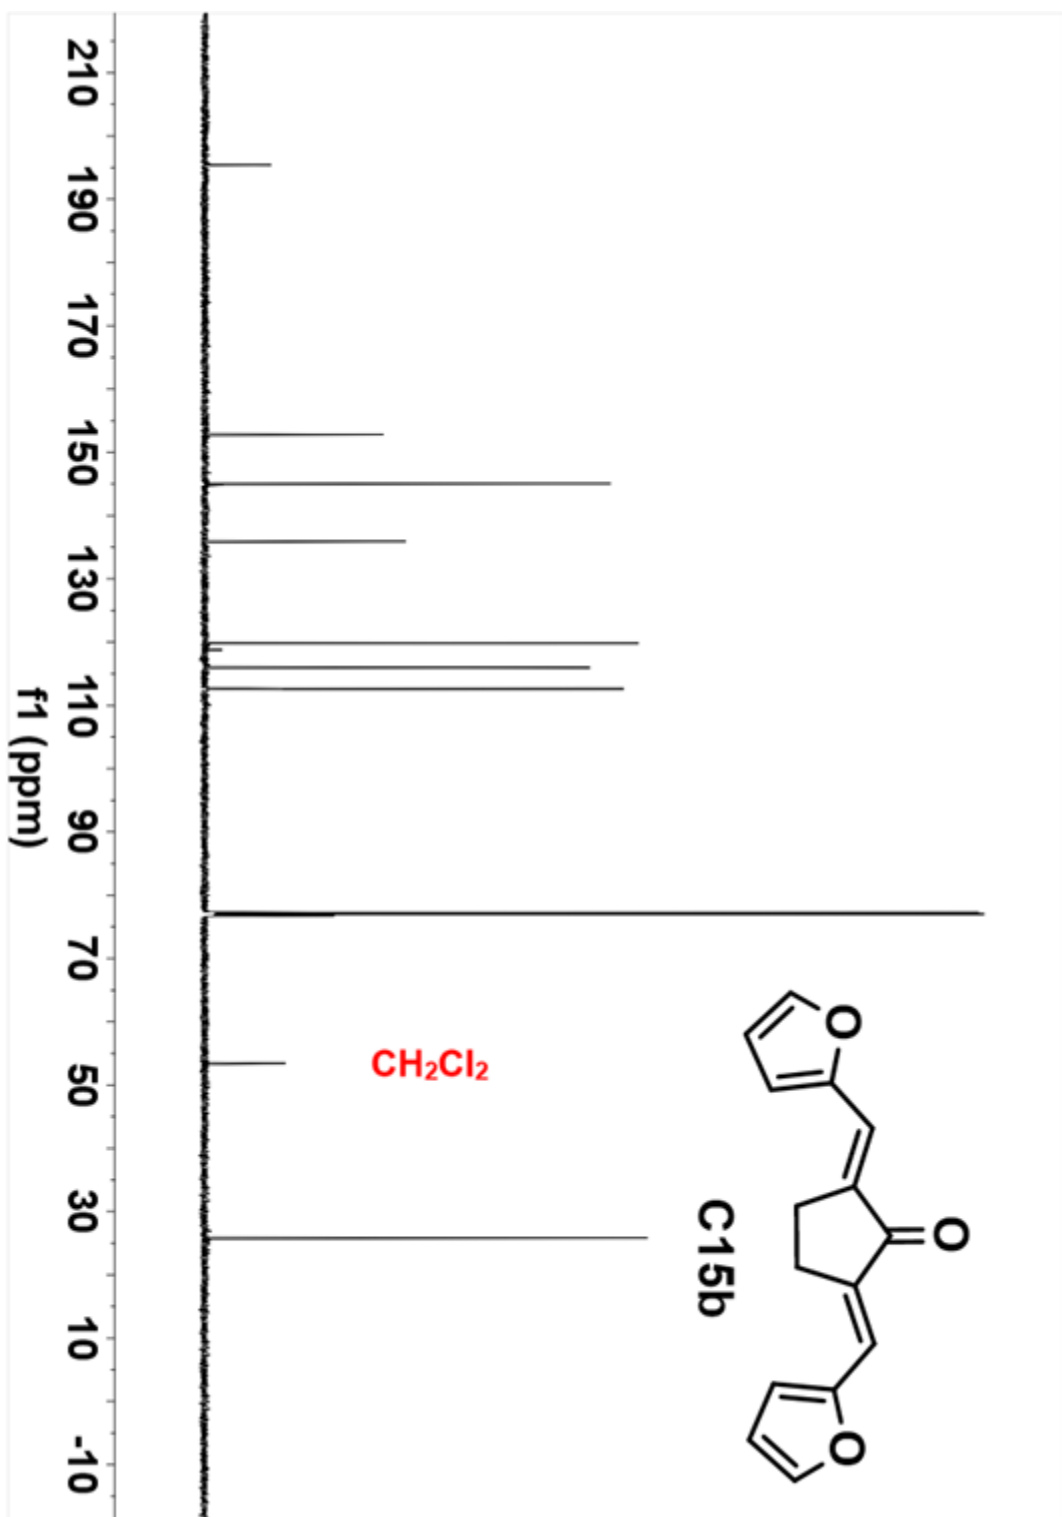

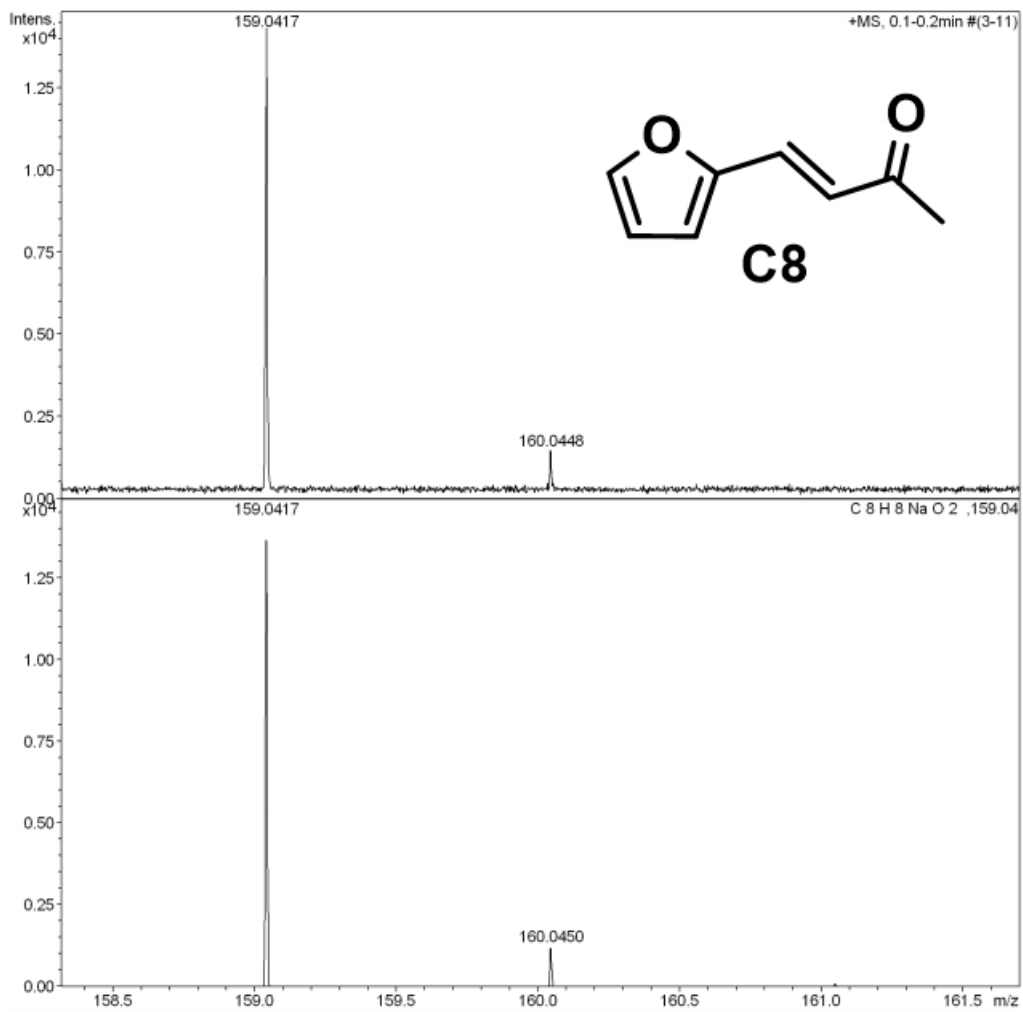

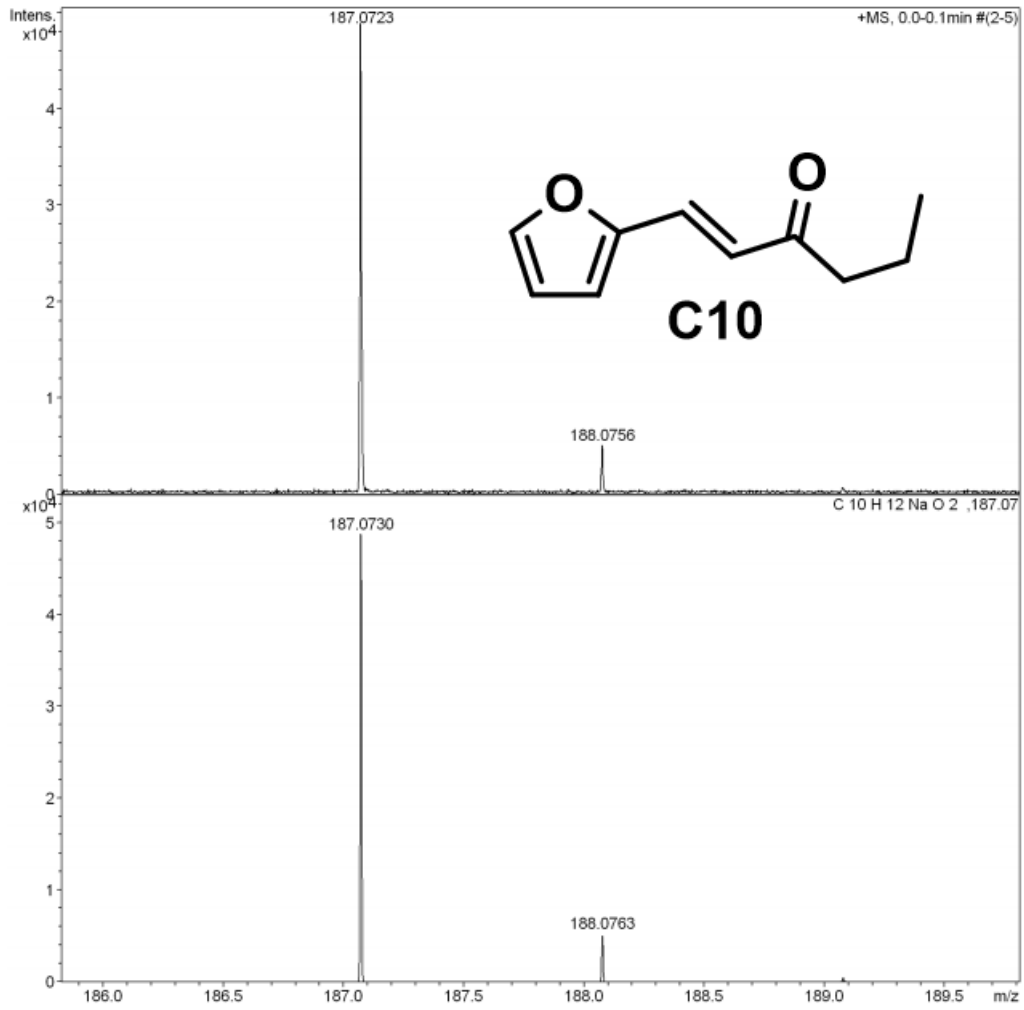

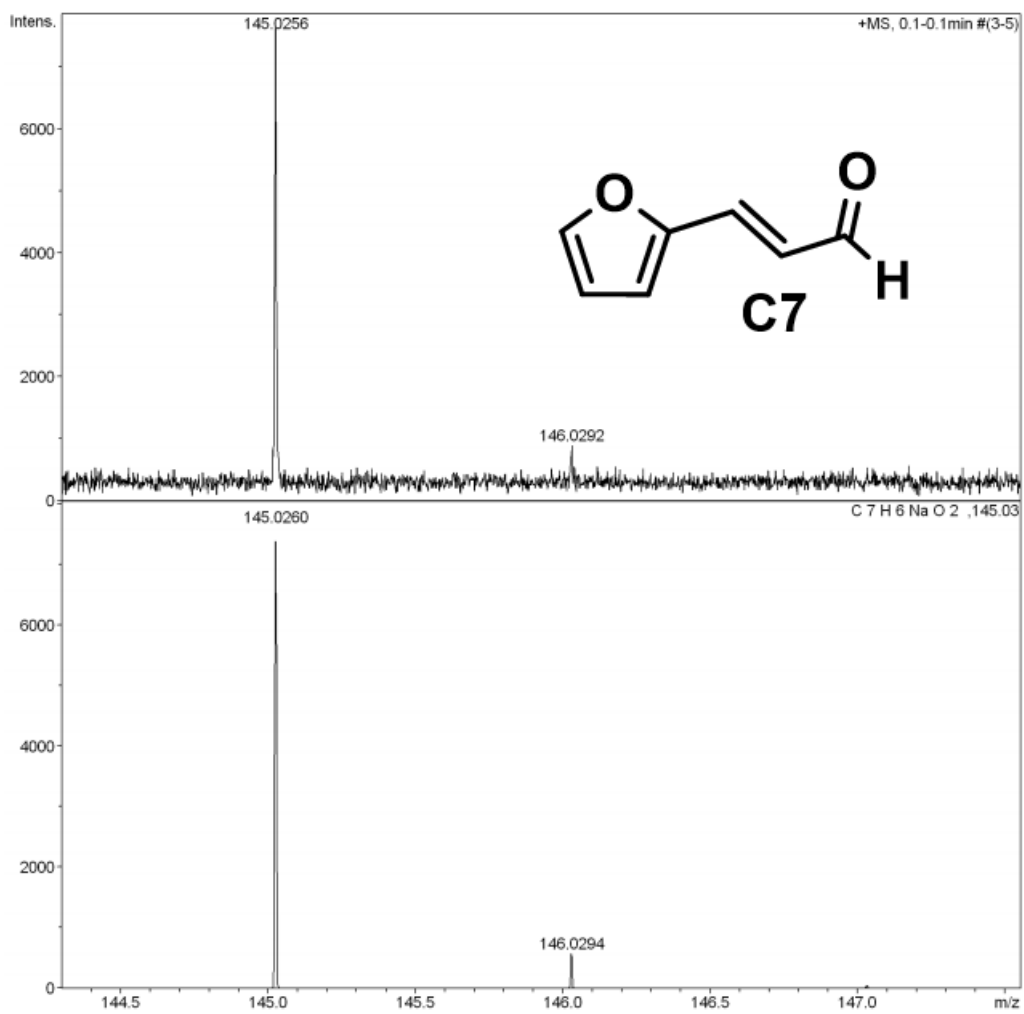

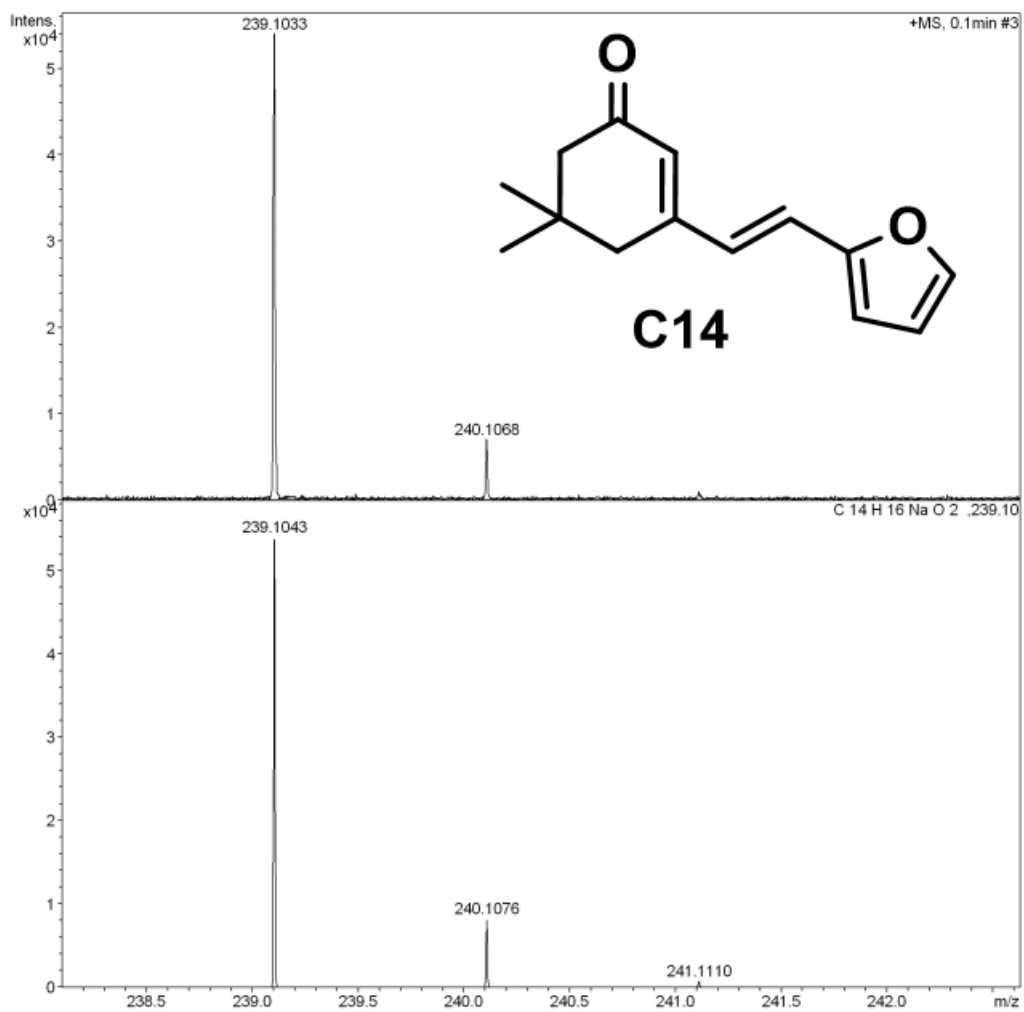

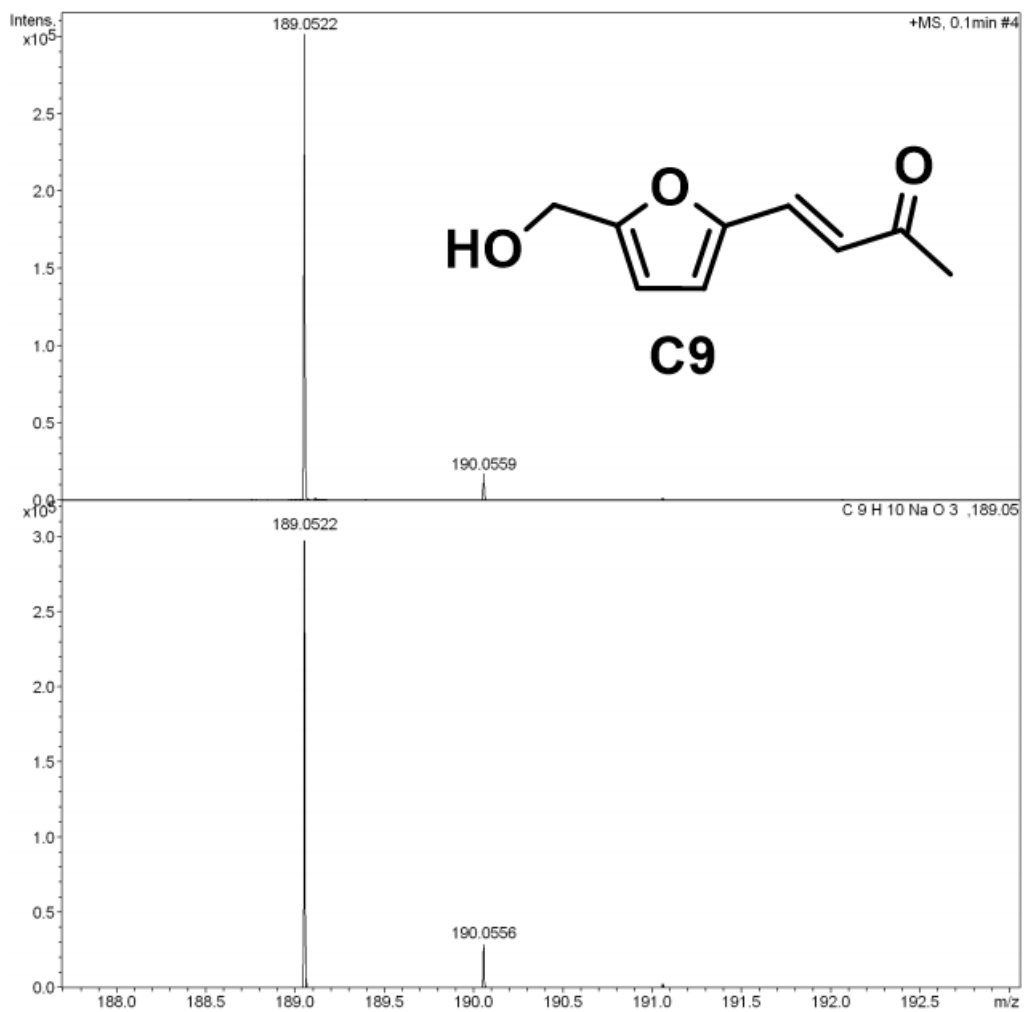

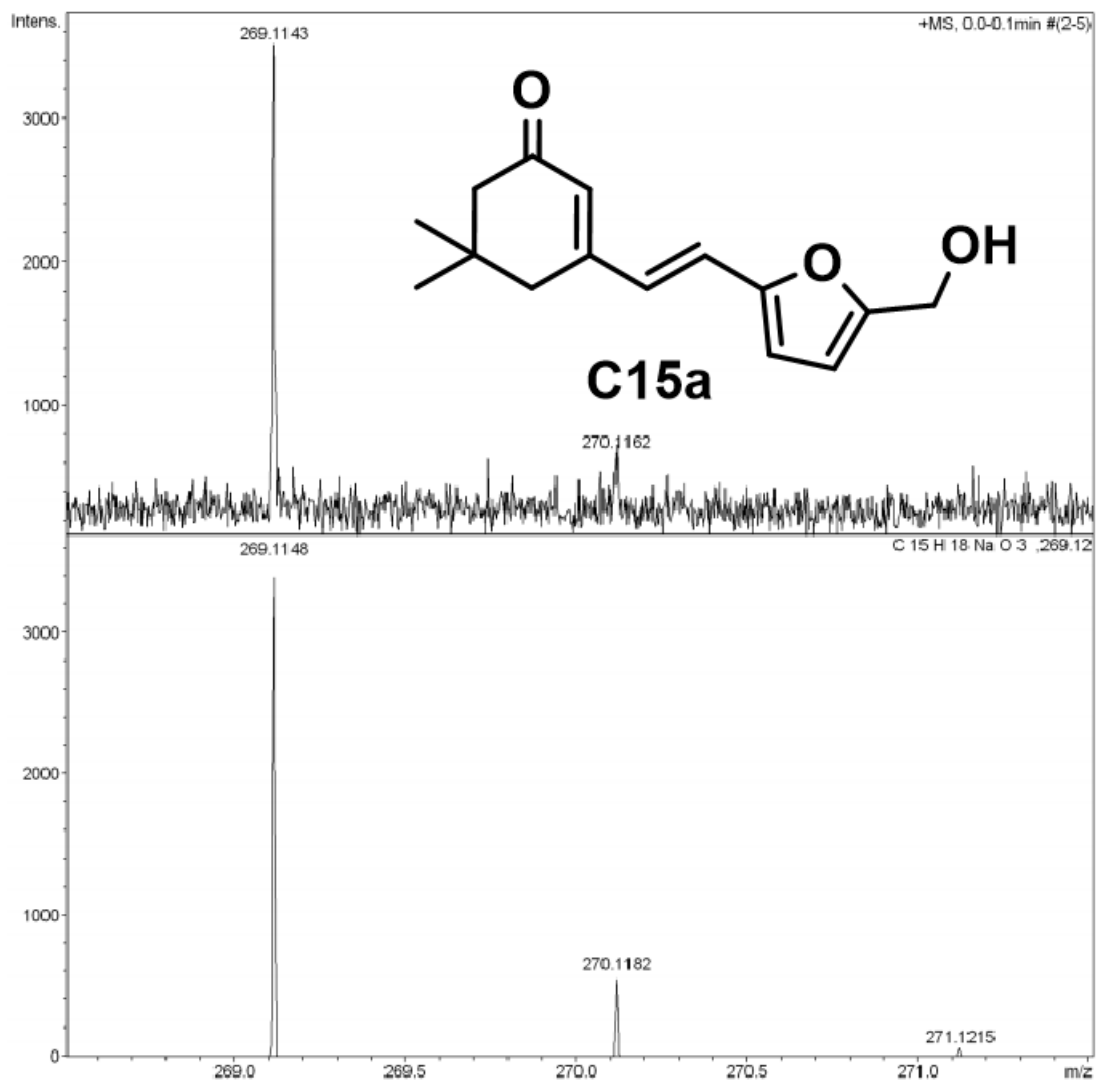



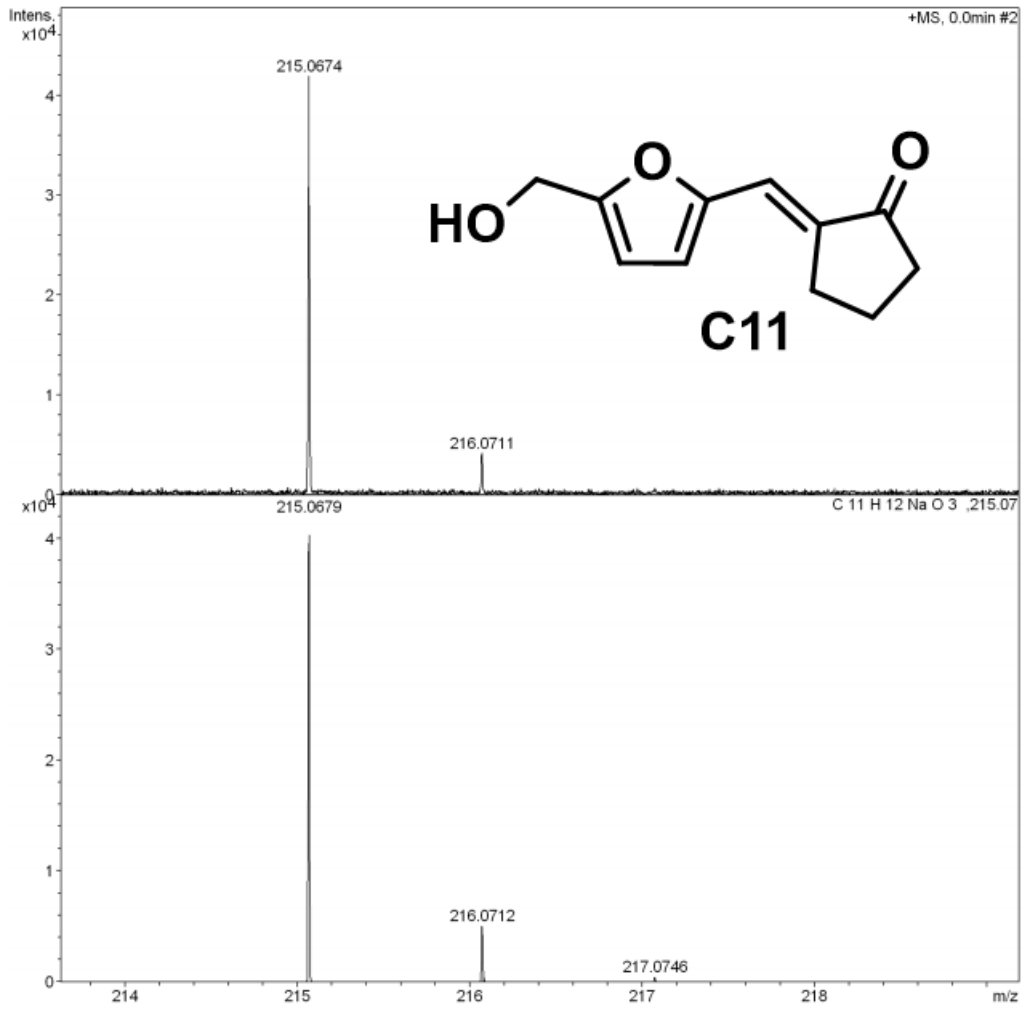

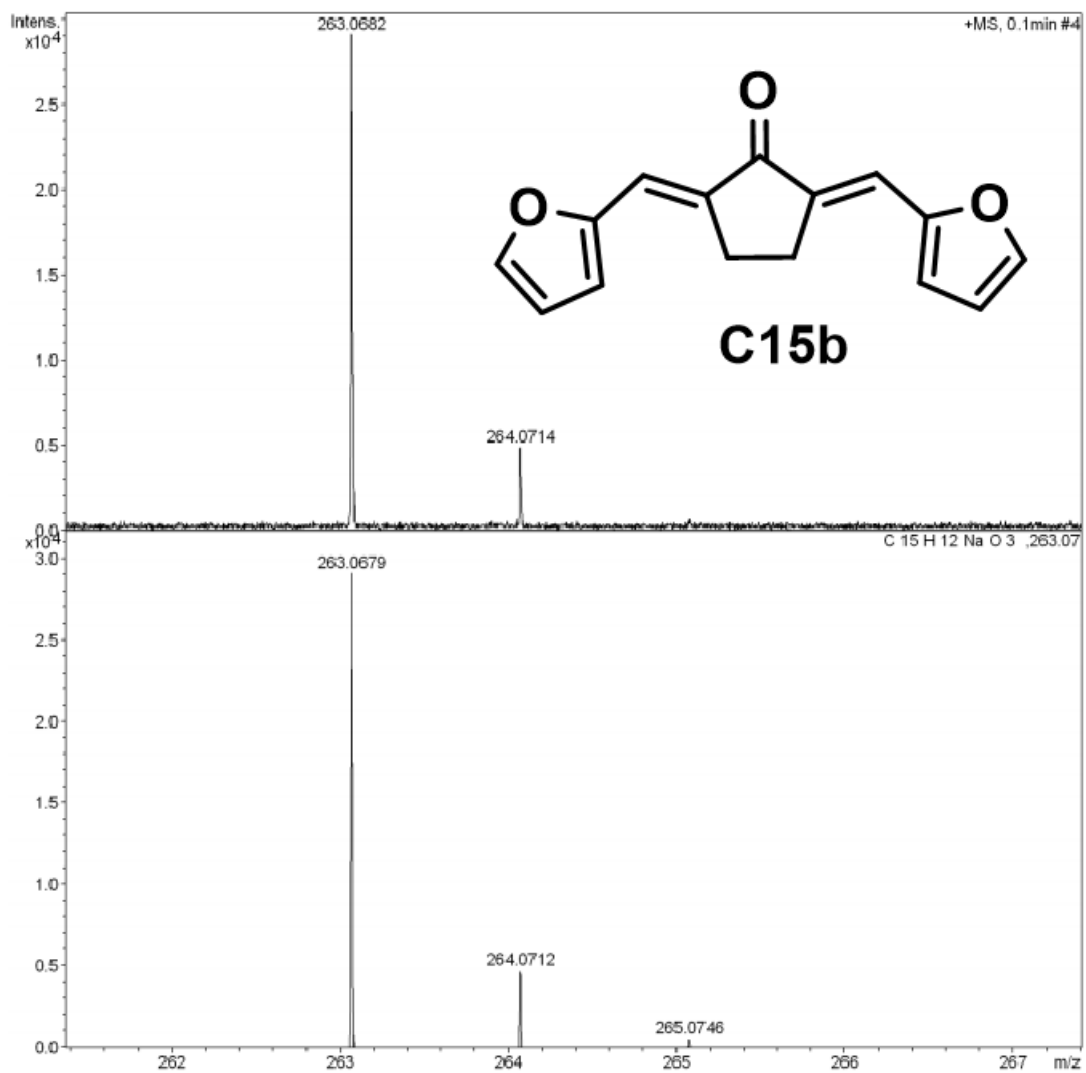

#### 4. Supporting References

1. H.-Y. Wang, R. Hu, Y.-J. Lei, Z.-Y. Jia, G.-L. Hu, C.-B. Li and Q. Gu, *Catal. Sci. Technol.*, 2020, **10**, 2821-2829.
2. J. Kou, C. Lu, J. Wang, Y. Chen, Z. Xu and R. S. Varma, *Chem. Rev.*, 2017, **117**, 1445-1514.
3. N. Jin, Y. Sun, W. Shi, P. Wang, Y. Nagaoka, T. Cai, R. Wu, L. Dube, H. N. Nyiera, Y. Liu, T. Mani, X. Wang, J. Zhao and O. Chen, *J. Am. Chem. Soc.*, 2023, **145**, 21886-21896.
4. W. W. Yu, L. Qu, W. Guo and X. Peng, *Chem. Mater.*, 2003, **15**, 2854-2860.
5. I. Lignos, R. M. Maceiczky, M. V. Kovalenko and S. Stavrakis, *Chem. Mater.*, 2020, **32**, 27-37.
6. J. Premkumar, *Chem. Mater.*, 2004, **16**, 3980-3981.
7. C. Mahala, M. D. Sharma and M. Basu, *Inorg. Chem.*, 2020, **59**, 6988-6999.
8. Y. Hu, X. Q. Hao, Z. W. Cui, J. Zhou, S. Q. Chu, Y. Wang and Z. G. Zou, *Appl. Catal. B Environ.*, 2020, **260**, 118131.
9. Y. Xu and M. A. A. Schoonen, *Am. Mineral.*, 2000, **85**, 543-556.
